# Supplementary material for: Mapping mining-affected water pollution in China: Status, patterns, risks, and implications
Source: Copernicus journal article supplement (doi:10.5194/hess-2024-387), 2024-12-16
Supplement: Supplementary file 2 [file hess-2024-387-supplement.zip]

## Sheet: Table S1
Table S1 Typical coal and metal mines in China
ID	Province	Mine name	Mine type	Sample size
1	Anhui	Banji	Coal mine	16
2	Anhui	Chaoshan	Gold mine	1
3	Anhui	Dingji	Coal mine	43
4	Anhui	Gubei	Coal mine	71
5	Anhui	Guqiao	Coal mine	59
6	Anhui	Haizi	Coal mine	3
7	Anhui	Huainan	Coal mine	21
8	Anhui	Jiegou	Coal mine	1
9	Anhui	Jiguanshan	Copper mine	2
10	Anhui	Jinkouling tailing pond	Copper mine	1
11	Anhui	Linhuan	Coal mine	12
12	Anhui	Nanshan	Iron mine	115
15	Anhui	Paner	Coal mine	60
13	Anhui	Panji	Coal mine	26
16	Anhui	Pansan	Coal mine	101
17	Anhui	Panxie	Coal mine	65
14	Anhui	Panyi	Coal mine	115
18	Anhui	Qianyingzi	Coal mine	80
19	Anhui	Qingdong	Coal mine	59
20	Anhui	Renlou	Coal mine	49
21	Anhui	Shizishan	Copper mine	92
22	Anhui	Shizishan-Xinqiao	Polymetallic mine	13
23	Anhui	Shuimuchong tailing pond	Copper mine	1
24	Anhui	Suixiao	Coal mine	4
25	Anhui	Sunan	Coal mine	39
26	Anhui	Suntuan	Coal mine	2
27	Anhui	Suxian	Coal mine	6
28	Anhui	Tianmashan	Gold mine	40
29	Anhui	Tongguanshan tailing pond	Copper mine	1
30	Anhui	Tongting	Coal mine	1
31	Anhui	Wolonghu	Coal mine	30
32	Anhui	Wugou	Coal mine	11
33	Anhui	Xiangshan	Pyrite mine	5
34	Anhui	Xiangshuichong tailing pond	Copper mine	3
35	Anhui	Xiangsigu tailing pond	Copper mine	1
36	Anhui	Xinqiao	Pyrite mine	3
37	Anhui	Xutuan	Coal mine	31
38	Anhui	Yangliu	Coal mine	2
39	Anhui	Yangshanchong tailing pond	Copper mine	6
40	Anhui	Yangzhuang	Coal mine	10
41	Anhui	Yuaner	Coal mine	51
42	Anhui	Yuanyi	Coal mine	1
43	Anhui	Zhongshan tailing pond	Iron mine	11
44	Chongqing	Songzao	Coal mine	10
45	Fujian	Linkeng	Coal mine	5
46	Fujian	Shangjing	Coal mine	3
47	Fujian	Yongan	Coal mine	3
48	Fujian	Zijinshan	Copper mine	22
49	Gansu	Baiyin	Copper mine	10
50	Guangdong	-	Lead-zinc mine	3
51	Guangdong	Dabaoshan	Polymetallic mine	526
52	Guangdong	Fankou	Lead-zinc mine	3
53	Guangdong	Lechang	Lead-zinc mine	2
54	Guangdong	Shirenzhang	Tungsten mine	5
55	Guangdong	Shuilongwei	Lead-zinc mine	28
56	Guangdong	Yunfu	Pyrite mine	103
57	Guangxi	Dachang	Lead-zinc mine	12
58	Guangxi	Daxin	Lead-zinc mine	3
59	Guangxi	Gaofeng	Lead-zinc mine	2
60	Guangxi	Gulan	Lead-zinc mine	1
61	Guangxi	Heshan	Coal mine	2
62	Guangxi	Huanjiang	Lead-zinc mine	1
63	Guangxi	Lida	Lead-zinc mine	1
64	Guangxi	Lifa	Lead-zinc mine	1
65	Guangxi	Lujing	Lead-zinc mine	1
66	Guangxi	Nandan	Lead-zinc mine	2
67	Guangxi	Panlong	Lead-zinc mine	1
68	Guangxi	Pingnan	Lead-zinc mine	1
69	Guangxi	Shanglin	Lead-zinc mine	3
70	Guangxi	Tongkeng	Lead-zinc mine	1
71	Guangxi	Wuxu	Lead-zinc mine	1
72	Guangxi	Xinxingwang	Lead-zinc mine	1
73	Guangxi	Zhanggongling	Lead-zinc mine	1
74	Guizhou	Anhong	Coal mine	1
75	Guizhou	Bamaoping	Coal mine	2
76	Guizhou	Banpo	Coal mine	4
77	Guizhou	Banpo	Antimony mine	22
78	Guizhou	Bijie	Coal mine	3
79	Guizhou	Chashan	Coal mine	1
80	Guizhou	Chetian River Basin	Coal mine	239
81	Guizhou	Congjiang	Antimony mine	3
82	Guizhou	Dafang	Coal mine	3
83	Guizhou	Dahebian	Coal mine	2
84	Guizhou	Dajing	Lead-zinc mine	2
85	Guizhou	Damaoshan	Coal mine	1
86	Guizhou	Dapo	Coal mine	2
87	Guizhou	Dayuan	Coal mine	1
88	Guizhou	Dushan	Coal mine	2
89	Guizhou	Dushan	Antimony mine	24
90	Guizhou	Duyun	Coal mine	3
91	Guizhou	Erhai	Coal mine	1
92	Guizhou	Feilong	Coal mine	1
93	Guizhou	Fenggang	Coal mine	4
94	Guizhou	Fenghuangshan	Coal mine	16
95	Guizhou	Fuquan	Coal mine	2
96	Guizhou	Gouchang	Coal mine	1
97	Guizhou	Guanling	Coal mine	2
98	Guizhou	Guanshanhu	Coal mine	2
99	Guizhou	Hezhang	Coal mine	4
100	Guizhou	Hongfa	Coal mine	8
101	Guizhou	Hongsheng	Coal mine	3
102	Guizhou	Hongyanjiao	Coal mine	16
103	Guizhou	Huaxi Creek	Coal mine	7
104	Guizhou	Huichuan	Coal mine	1
105	Guizhou	Huishui	Coal mine	2
106	Guizhou	Jianghe	Coal mine	1
107	Guizhou	Jiangkou	Coal mine	3
108	Guizhou	Jiaole	Coal mine	209
109	Guizhou	Jinsha	Coal mine	319
110	Guizhou	Jiujiadong	Coal mine	7
111	Guizhou	Kaili	Coal mine	23
112	Guizhou	Lanmuchang	Thallium-Hydrargyrum mine	7
113	Guizhou	Libo	Coal mine	6
114	Guizhou	Liuzhi	Coal mine	1
115	Guizhou	Longchang	Coal mine	2
116	Guizhou	Longgong	Coal mine	1
117	Guizhou	Longli	Coal mine	1
118	Guizhou	Maiping	Coal mine	22
119	Guizhou	Majiang	Coal mine	65
120	Guizhou	Meitan	Coal mine	1
121	Guizhou	Nayong	Coal mine	4
122	Guizhou	Panzhou	Coal mine	5
123	Guizhou	Pingba	Coal mine	6
124	Guizhou	Pingdi	Coal mine	1
125	Guizhou	Pingluhe	Coal mine	1
126	Guizhou	Pingtang	Coal mine	2
127	Guizhou	Puan	Coal mine	3
128	Guizhou	Puding	Polymetallic mine	7
129	Guizhou	Qianxi	Coal mine	3
130	Guizhou	Qiaotou	Coal mine	1
131	Guizhou	Qingganglin	Coal mine	1
132	Guizhou	Qinglong	Coal mine	3
133	Guizhou	Qingshan	Lead-zinc mine	5
134	Guizhou	Qingzhen	Coal mine	2
135	Guizhou	Qituo	Coal mine	1
136	Guizhou	Qixingguan	Coal mine	2
137	Guizhou	Renhuai	Coal mine	5
138	Guizhou	Rongjiang	Antimony mine	19
139	Guizhou	Sandu	Antimony mine	22
140	Guizhou	Sangda	Coal mine	1
141	Guizhou	Sanjiazhai	Coal mine	1
142	Guizhou	Shunfa	Coal mine	1
143	Guizhou	Suiyang	Coal mine	7
144	Guizhou	Tongzi	Coal mine	8
145	Guizhou	Wanli-Qinggangao	Coal mine	1
146	Guizhou	Weining	Coal mine	4
147	Guizhou	Wengan	Coal mine	2
148	Guizhou	Xiangqi	Coal mine	1
149	Guizhou	Xiangshui	Coal mine	1
150	Guizhou	Xiangxing	Coal mine	1
151	Guizhou	Xinggui	Coal mine	1
152	Guizhou	Xingren	Coal mine	150
153	Guizhou	Xinyuan	Coal mine	1
154	Guizhou	Xishui	Coal mine	8
155	Guizhou	Xixiu	Coal mine	4
156	Guizhou	Yangliu Street	Coal mine	3
157	Guizhou	Yifa	Coal mine	1
158	Guizhou	Yudong	Coal mine	2
159	Guizhou	Yudong River Basin	Coal mine	100
160	Guizhou	Yuqing	Coal mine	1
161	Guizhou	Zhenfeng	Coal mine	2
162	Guizhou	Zhijin	Coal mine	300
163	Guizhou	Zhongling	Coal mine	1
164	Guizhou	Zhongshan	Coal mine	3
165	Guizhou	Zhongtian	Coal mine	1
166	Hainan	Shilu	Hematite mine	1
167	Hebei	Fengfeng	Coal mine	65
168	Hebei	Handan	Coal mine	28
169	Hebei	Zhongguan	Pyrite mine	39
170	Henan	Jiaozuo	Coal mine	104
171	Henan	Pingdingshan	Coal mine	55
172	Hubei	Daye	Copper mine	39
173	Hubei	Gaolan	Pyrite mine	2
174	Hubei	Tonglushan	Copper mine	3
175	Hubei	Tongshankou	Copper mine	30
176	Hubei	Xianju	Pyrite mine	5
177	Hunan	Hejiacun	Uranium mine	10
178	Hunan	Shaodong	Coal mine	1
179	Hunan	Shengli	Coal mine	8
180	Hunan	Shimen	Coal mine	4
181	Hunan	Xikuangshan	Antimony mine	202
182	Inner Mongolia	Bayan Obo tailing pond	Rare earth mine	78
183	Inner Mongolia	Buertai	Coal mine	40
184	Inner Mongolia	Bulianta	Coal mine	5
185	Inner Mongolia	Dongming	Coal mine	21
186	Inner Mongolia	Huolinhe	Coal mine	31
187	Inner Mongolia	Longwanggou	Coal mine	106
188	Inner Mongolia	Menkeqing	Coal mine	28
189	Inner Mongolia	Mindong No.1	Coal mine	10
190	Inner Mongolia	Nalinhe	Coal mine	16
191	Inner Mongolia	Shangwan	Coal mine	5
192	Inner Mongolia	Shilawusu	Coal mine	6
193	Inner Mongolia	Taigemiao	Coal mine	22
194	Inner Mongolia	Tangjiahui	Coal mine	33
195	Inner Mongolia	Wulanmulun	Coal mine	10
196	Inner Mongolia	Wulanmulun River Basin	Coal mine	42
197	Inner Mongolia	Yimin	Coal mine	15
198	Jiangsu	Jiahe	Coal mine	9
199	Jiangsu	Pangzhuang	Coal mine	26
200	Jiangsu	Qixiashan	Lead-zinc-silver mine	1
201	Jiangsu	Shitun	Coal mine	2
202	Jiangsu	Wangzhuang	Coal mine	4
203	Jiangsu	Zhangxiaolou	Coal mine	4
204	Jiangxi	Dexing	Copper mine	80
205	Jiangxi	Dingnan	Rare earth mine	6
206	Jiangxi	Dongxiang	Copper mine	1
207	Jiangxi	Longnan	Rare earth mine	37
208	Jiangxi	Tongchang	Copper mine	4
209	Jiangxi	Wushan	Copper mine	1
210	Jiangxi	Xinlong	Rare earth mine	30
211	Jiangxi	Yinshan	Copper mine / Lead-zinc mine	9
212	Jiangxi	Yongping	Copper mine	10
213	Liaoning	Dagushan	Iron mine	46
214	Ningxia	Yuanyanghu	Coal mine	74
215	Qinghai	Qilian coal base	Coal mine	42
216	Shaanxi	Baihe	Pyrite mine	81
217	Shaanxi	Balasu	Coal mine	5
218	Shaanxi	Binchang	Coal mine	20
219	Shaanxi	Caojiatan	Coal mine	51
220	Shaanxi	Dahaize	Coal mine	35
221	Shaanxi	Daliuta	Coal mine	10
222	Shaanxi	Guojiawan	Coal mine	13
223	Shaanxi	Halagou	Coal mine	29
224	Shaanxi	Jinduicheng	Molybdenum mine	17
225	Shaanxi	Jinjie	Coal mine	3
226	Shaanxi	Longde	Coal mine	36
227	Shaanxi	Ningtiaota	Coal mine	79
228	Shaanxi	Sangshuping	Coal mine	22
229	Shaanxi	Shenfu	Coal mine	76
230	Shaanxi	Shigetai	Coal mine	6
231	Shaanxi	Wuliba	Pyrite mine	30
232	Shaanxi	Yonglong	Coal mine	34
233	Shaanxi	Yuheng	Coal mine	67
234	Shaanxi	Yushen	Coal mine	253
235	Shaanxi	Yuyang	Coal mine	26
236	Shaanxi-Inner Mongolia	Shendong	Coal mine	496
237	Shandong	Binhu	Coal mine	25
238	Shandong	Dongtan	Coal mine	6
239	Shandong	Hongshan-Zhaili	Coal mine	80
240	Shandong	Liangjia	Coal mine	103
241	Shandong	Sanshandao	Gold mine	140
242	Shandong	Wangchao	Coal mine	23
243	Shandong	Xiaoyun	Coal mine	16
244	Shandong	Xinglongzhuang	Coal mine	84
245	Shandong	Xinjulong	Coal mine	35
246	Shandong	Zhaoyuan	Gold mine	44
247	Shanxi	Beiyan	Coal mine	1
248	Shanxi	Datong / Xinding / Taiyuan / Linfen / Yuncheng	Coal mine	408
249	Shanxi	Dongqu	Coal mine	12
250	Shanxi	Dongzhou	Coal mine	1
251	Shanxi	Duerping	Coal mine	7
252	Shanxi	Guandi	Coal mine	8
253	Shanxi	Gujiao	Coal mine	16
254	Shanxi	Hongtuyan	Coal mine	3
255	Shanxi	Hongyuan	Coal mine	1
256	Shanxi	Jiajiagou	Coal mine	1
257	Shanxi	Linfen	Coal mine	4
258	Shanxi	Liulin	Coal mine	1
259	Shanxi	Malan	Coal mine	30
260	Shanxi	Nanzhuang	Coal mine	1
261	Shanxi	Niangziguan	Coal mine	20
262	Shanxi	Shandi River Basin	Coal mine	2
263	Shanxi	Sitai	Coal mine	25
264	Shanxi	Tunlan	Coal mine	54
265	Shanxi	Wukuang	Coal mine	1
266	Shanxi	Xiaogou	Coal mine	5
267	Shanxi	Xiaohe	Coal mine	1
268	Shanxi	Ximing	Coal mine	6
269	Shanxi	Xingwu	Coal mine	1
270	Shanxi	Xiqu	Coal mine	81
271	Shanxi	Yuejin	Coal mine	1
272	Shanxi	Zhenchengdi	Coal mine	25
273	Shanxi	Zhongtiaoshan	Copper mine	1
274	Sichuan	Chuanbei	Coal mine	30
275	Sichuan	Chuannan	Coal mine	6
276	Sichuan	Dalaingzi	Lead-zinc mine	8
277	Sichuan	Dashu	Pyrite mine	69
278	Sichuan	Guxu	Coal mine	4
279	Sichuan	Huangjiagou	Coal mine	57
280	Sichuan	Kongjiagou	Coal mine	38
281	Sichuan	Shiping	Pyrite mine	27
282	Tibet	Gaize	Copper mine	12
283	Tibet	Yulong	Copper mine	1
284	Xinjiang	Balikun	Coal mine	13
285	Xinjiang	Dananhu	Coal mine	20
286	Xinjiang	Donggou	Coal mine	2
287	Xinjiang	Kuangou	Coal mine	4
288	Xinjiang	Naomaohu	Coal mine	50
289	Xinjiang	Santanghu	Coal mine	107
290	Xinjiang	Shihongtan	Uranium mine	19
291	Xinjiang	Wudong	Coal mine	23
292	Xinjiang	Yushuquan	Coal mine	15
293	Yunnan	Bainiuchang	Polymetallic mine	15
294	Yunnan	Gejiu	Tin mine	15
295	Yunnan	Jinding	Lead-zinc mine	2
296	Yunnan	Qujing	Coal mine	8
297	Yunnan	Wangjiatan	Iron mine	1
298	Zhejiang	Suichang	Gold mine	1
