# Supplementary material for: Mapping mining-affected water pollution in China: Status, patterns, risks, and implications
Source: Copernicus journal article supplement (doi:10.5194/hess-2024-387), 2024-12-16
Supplement: Supplementary file 2 [file hess-2024-387-supplement.zip]

***Supplement of:***

**Mapping mining-affected water pollution in China: Status, patterns, risks, and implications**

Ziyue Yin<sup>1</sup>, Jian Song<sup>2</sup>, Dianguang Liu<sup>1</sup>, Jianfeng Wu<sup>1,\*</sup>, Yun Yang<sup>2</sup>, Yuanyuan Sun<sup>1</sup>, Jichun Wu<sup>1</sup>

<sup>1</sup> Key Laboratory of Surficial Geochemistry, Ministry of Education, Department of Hydrosciences, School of Earth Sciences and Engineering, Nanjing University, Nanjing 210023, China

<sup>2</sup> School of Earth Sciences and Engineering, Hohai University, Nanjing 211100, China

\* Corresponding authors. Tel: +86 25 89680853; fax: +86 25 83686016

*E-mail address:* [jfwu@nju.edu.cn](mailto:jfwu@nju.edu.cn) (J.F. Wu)

16    ***S1   Database establishment***

17        The typical mine lists ([Table S1](#)) are presented in the [ESM2.xlsx](#) document. The sources (*i.e.*,  
18    293 research papers) of high-quality data are listed in the section of ***References*** at the end of the  
19    text.

20

21 **S2 Risk assessment**

22 **Table S2.** The main parameters used for human health risk assessment.

| Parameter | Description                 | Unit              | Value |          | Source               |
|-----------|-----------------------------|-------------------|-------|----------|----------------------|
|           |                             |                   | Adult | Children |                      |
| <i>IR</i> | Ingestion rate              | L/d               | 2.50  | 0.78     | [1], [2]             |
| <i>EF</i> | Exposure frequency          | d/yr              | 350   | 350      | [1], [2]             |
| <i>ED</i> | Exposure duration           | yr                | 24    | 6        | [2]                  |
| <i>ET</i> | Time of contact             | h/d               | 0.58  | 1.00     | [3], [4]             |
| <i>SA</i> | Skin surface area           | cm <sup>2</sup>   | 19652 | 6365     | [1], [2]             |
| <i>CF</i> | Conversion factor           | L/cm <sup>3</sup> | 0.001 | 0.001    | [2], [5]             |
| <i>BW</i> | Body weight                 | kg                | 70    | 15       | [1], [3], [4]        |
| <i>AT</i> | Averaging time <sup>a</sup> | d                 | 8760  | 2190     | <i>ED</i> × 365 d/yr |
|           | Averaging time <sup>b</sup> |                   | 25550 | 25550    | 70 × 365 d/yr        |

23 Note: <sup>a</sup> averaging time used for non-carcinogenic risks (NCRs), and <sup>b</sup> averaging time used for carcinogenic risks  
24 (CRs), which is equal to a lifetime (70 yr in the study) × 365 d/yr. The parameter values used in the study are  
25 obtained from the following literature sources: [1] [Meng et al. \(2024\)](#); [2] [Shi et al. \(2023\)](#); [3] [Tong et al. \(2021\)](#);  
26 [4] [Wang et al. \(2021\)](#); and [5] [Yuan et al. \(2023\)](#).

27

**Table S3.** The values of main parameters including permeability coefficient of skin ( $K_p$ ), reference dose ( $RfD_o$ ), gastrointestinal digestion coefficient ( $ABS_{GI}$ ), and slope factor (SF) for each element.

| Parameter | $K_p$  | $RfD_o$   | $ABS_{GI}$ | SF        | Source                       |
|-----------|--------|-----------|------------|-----------|------------------------------|
|           | (cm/h) | (mg/kg·d) | (-)        | (kg·d/mg) |                              |
| Fe        | 0.001  | 0.7       | 0.2        | -         | [1], [2], [3], [4], [6]      |
| Mn        | 0.001  | 0.024     | 0.04       | -         | [1], [2], [3], [4], [6]      |
| Cr        | 0.002  | 0.003     | 0.025      | 0.5       | [1], [3], [6], [7]           |
| Ni        | 0.0002 | 0.02      | 0.04       | -         | [1], [2], [3], [4], [6], [7] |
| Cu        | 0.001  | 0.04      | 0.2        | -         | [1], [2], [3], [4], [6], [7] |
| Zn        | 0.0006 | 0.3       | 0.2        | -         | [1], [2], [3], [4], [5], [6] |
| As        | 0.001  | 0.0003    | 1          | 1.5       | [1], [3], [7]                |
| Cd        | 0.001  | 0.0005    | 0.05       | 0.38      | [2], [3], [4], [6]           |
| Pb        | 0.0001 | 0.0014    | 0.3        | -         | [1], [3], [6]                |

Note: The parameter values for each element are obtained from the following literature sources: [1] [Meng et al. \(2024\)](#); [2] [Shi et al. \(2023\)](#); [3] [Tong et al. \(2021\)](#); [4] [USEPA \(2002\)](#); [5] [USEPA \(2014\)](#); [6] [Wang et al. \(2021\)](#); and [7] [Zheng et al. \(2023\)](#).

## S2-References

Meng, F., Cao, R., Zhu, X., Zhang, Y., Liu, M., Wang, J., Chen, J., and Geng, N.: A nationwide investigation on the characteristics and health risk of trace elements in surface water across China. *Water Res.*, 250, 121076, <https://doi.org/10.1016/j.watres.2023.121076>, 2024.

Shi, J., Zhao, D., Ren, F., and Huang, L.: Spatiotemporal variation of soil heavy metals in China: The pollution status and risk assessment. *Sci. Total Environ.*, 871, 161768, <https://doi.org/10.1016/j.scitotenv.2023.161768>, 2023.

Tong, S., Li, H., Tudi, M., Yuan, X., and Yang, L.: Comparison of characteristics, water quality and health risk assessment of trace elements in surface water and groundwater in China. *Ecotox. Environ. Safe.*, 219, 112283, <https://doi.org/10.1016/j.ecoenv.2021.112283>, 2021.

USEPA: Risk-based Concentration Table. U.S. Environment Protection Agency (Washington DC), 2002.

USEPA: Human health evaluation manual, supplemental guidance: update of standard default exposure factors. Environment Protection Agency (Washington DC), 2014.

Wang, J., Liu, G., Liu, H., and Lam, P.K.S.: Multivariate statistical evaluation of dissolved trace elements and a water quality assessment in the middle reaches of Huaihe River, Anhui, China. *Sci., Total Environ.*, 583, 421-431, <https://doi.org/10.1016/j.scitotenv.2017.01.088>, 2017.

Yuan, R., Li, Z., and Guo, S.: Health risks of shallow groundwater in the five basins of Shanxi, China: Geographical, geological and human activity aspects. *Environ. Pollut.*, 316, 120524, <https://doi.org/10.1016/j.envpol.2022.120524>, 2023.

Zheng, X., Lu, Y., Xu, J., Geng, H., and Li, Y.: Assessment of heavy metals leachability characteristics and associated risk in typical acid mine drainage (AMD)-contaminated river sediments from North China. *J. Clean. Product.*, 413, 137338, <https://doi.org/10.1016/j.jclepro.2023.137338>, 2023.

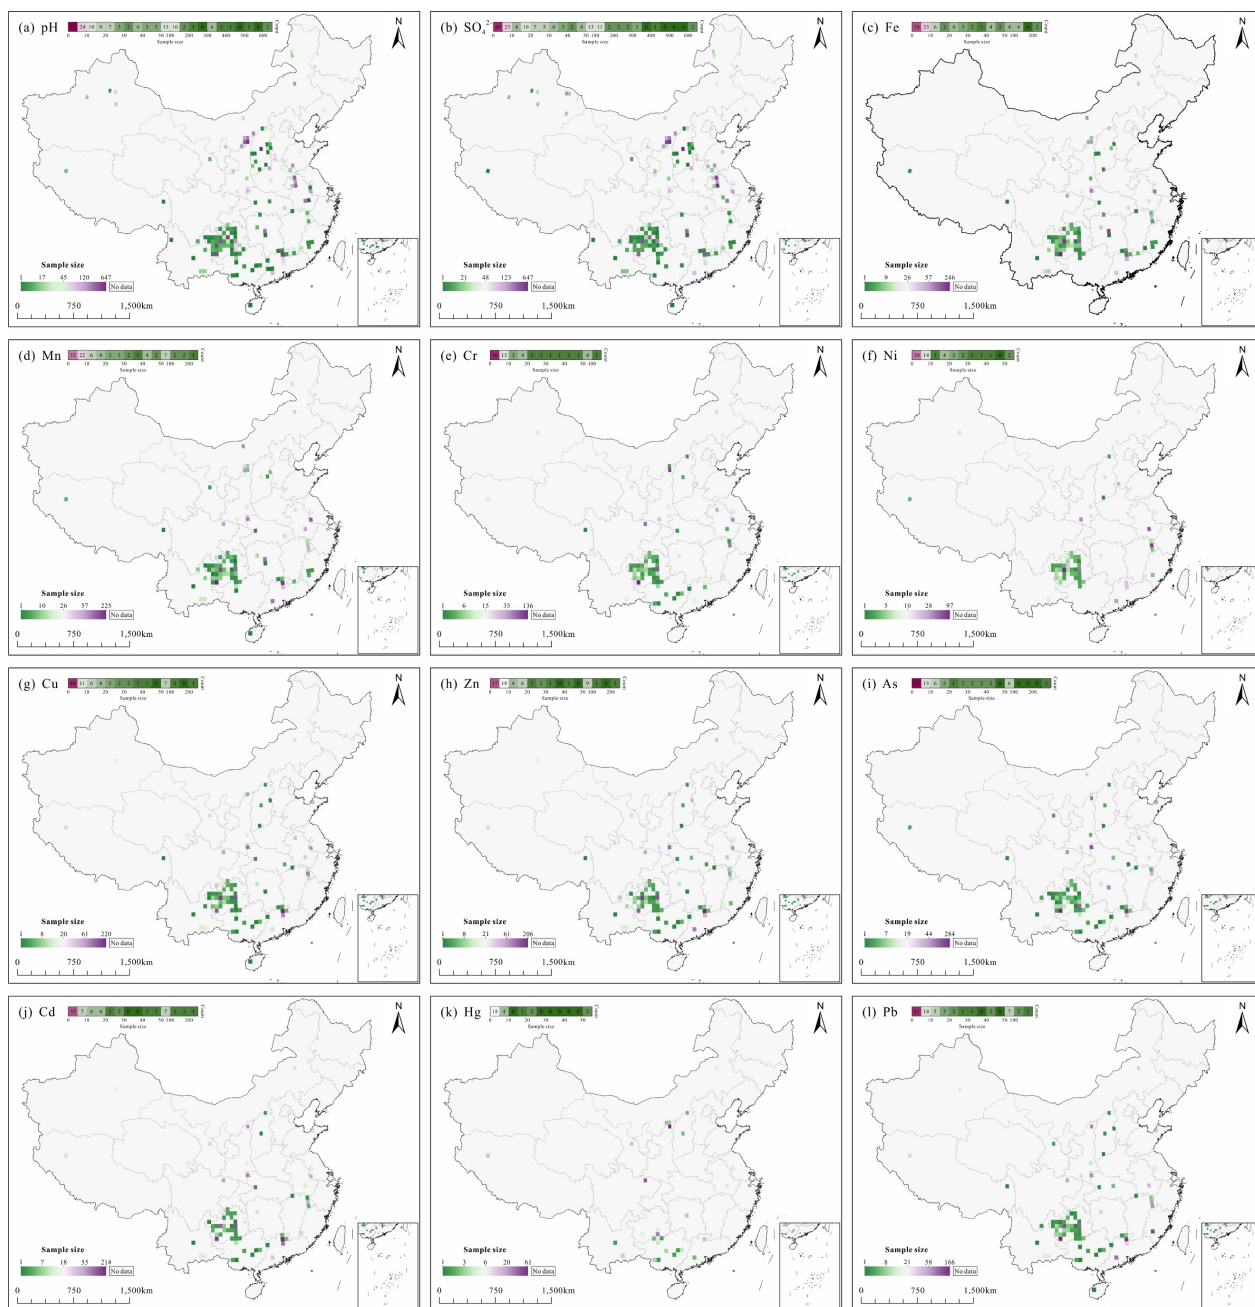

60

61 **Figure S1.** Spatial distributions of the sample size of (a) pH, (b)  $\text{SO}_4^{2-}$ , (c) Fe, (d) Mn, (e) Cr, (f)

62 Ni, (g) Cu, (h) Zn, (i) As, (j) Cd, (k) Hg, and (l) Pb in mining-affected water on the  $0.5^\circ$  grid.

63

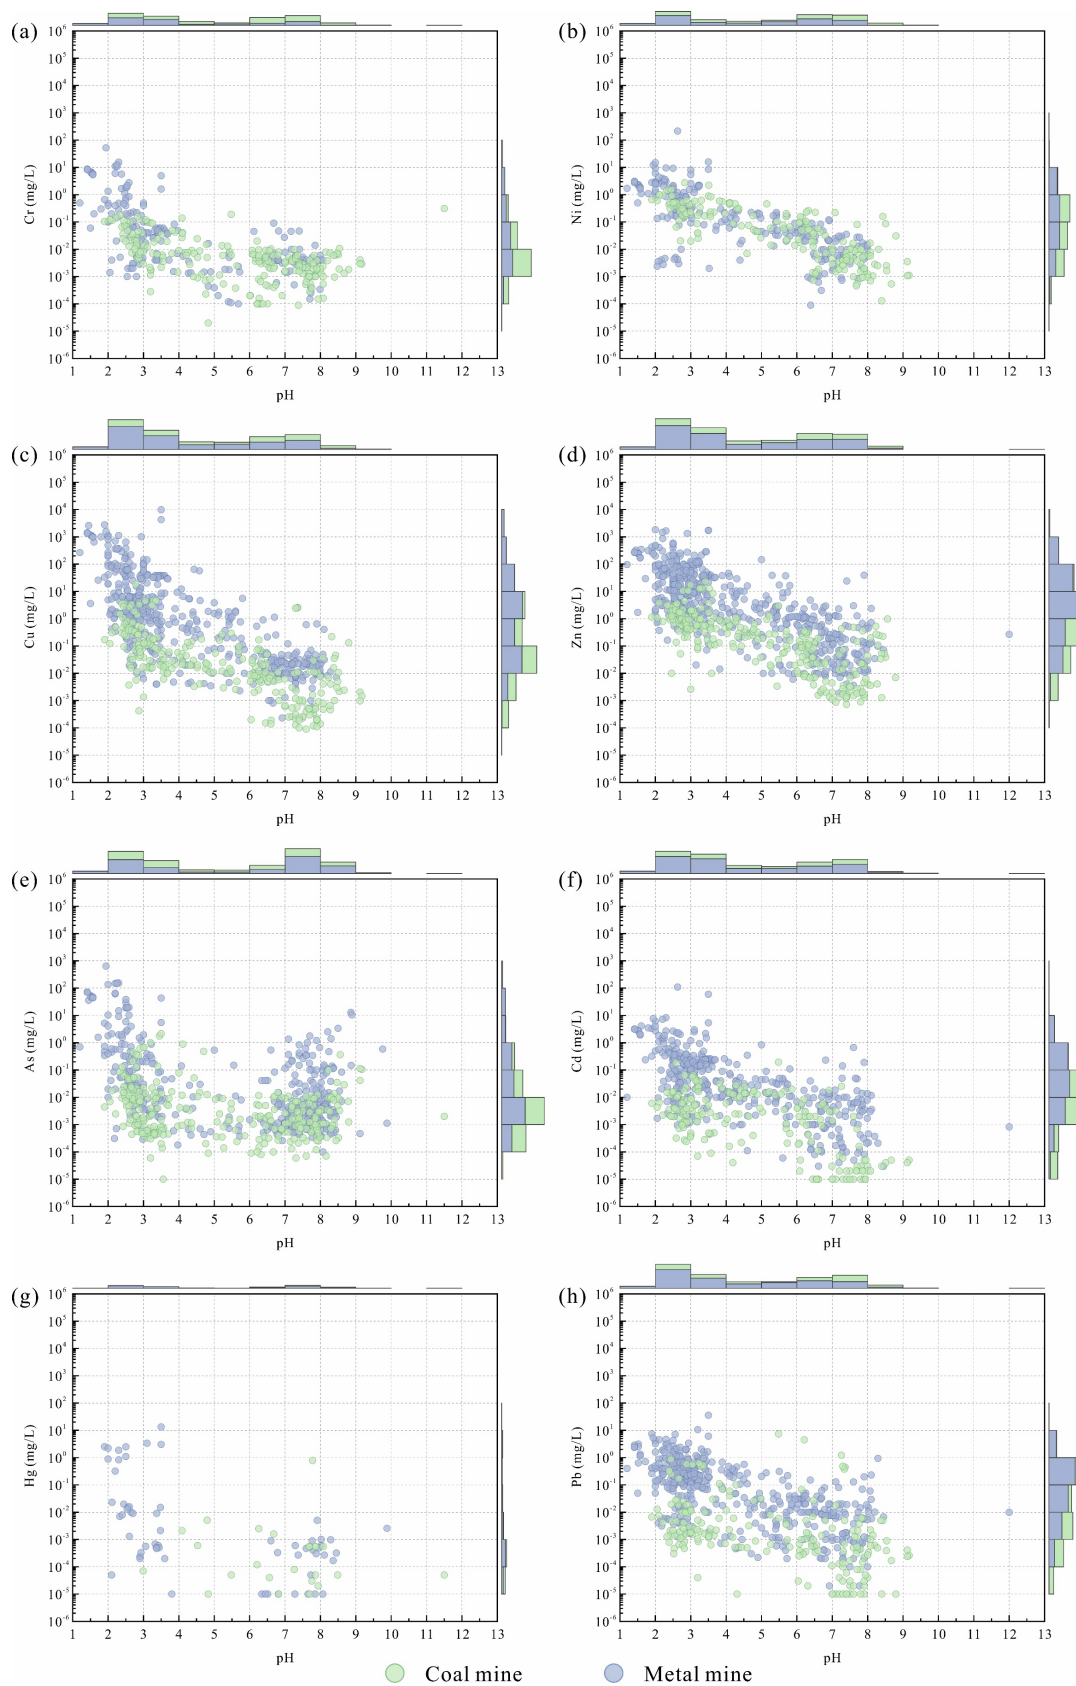

64

65 **Figure S2.** The respective relationships of pH versus (a) Cr, (b) Ni, (c) Cu, (d) Zn, (e) As, (f) Cd,  
 66 (g) Hg, and (h) Pb in coal and metal mines.

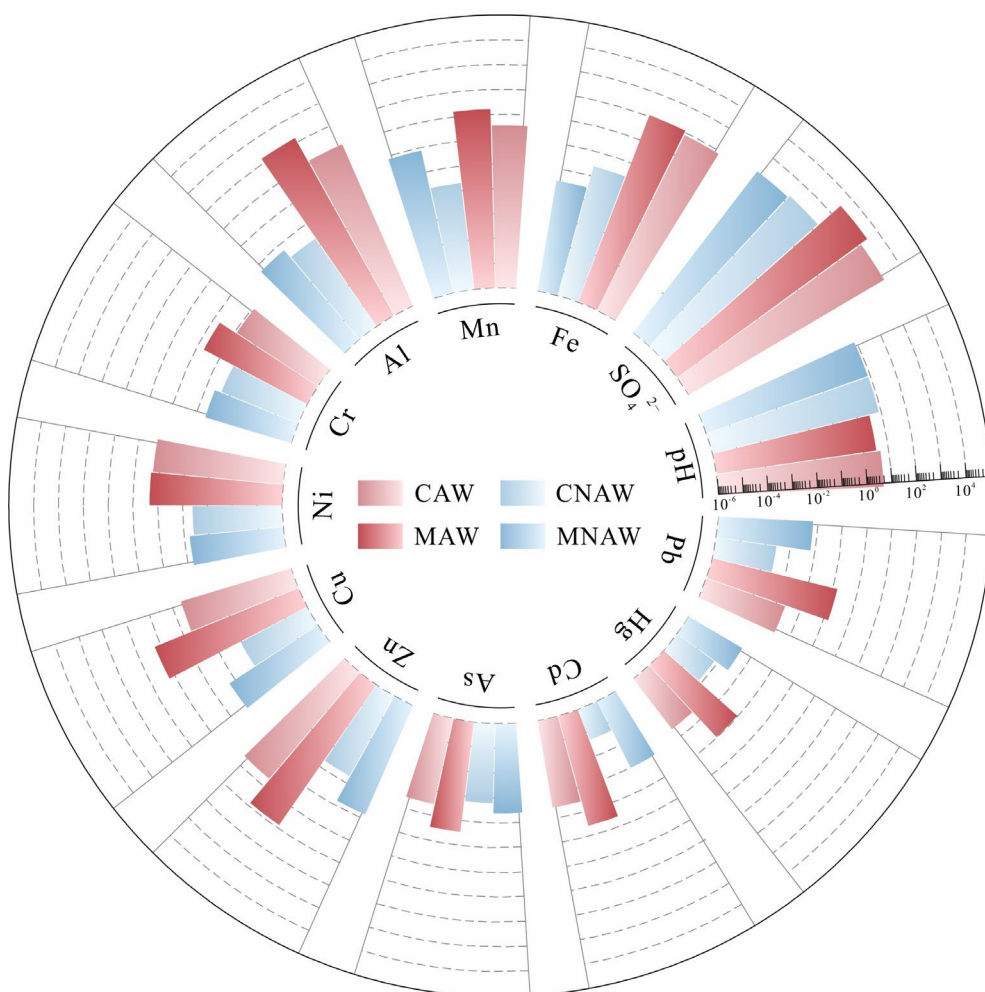

**Figure S3.** The comparison of multi-component concentrations (mg/L, except for pH) in coal and metal mines. CAW and MAW are the acid water of coal and metal mines; and CNAW and MNAW are the neutral/alkaline water of coal and metal mines, respectively.



73 **Table S4.** The categories of the Environmental Quality Standards for Surface Water (GB 3838-2002).

| Item            | Class I | Class II | Class III | Class IV | Class V |
|-----------------|---------|----------|-----------|----------|---------|
| pH              |         |          | 6.0 – 9.0 |          |         |
| SO <sub>4</sub> | -       | -        | -         | -        | -       |
| Fe              | -       | -        | -         | -        | -       |
| Mn              | -       | -        | -         | -        | -       |
| Cr              | 0.01    | 0.05     | 0.05      | 0.05     | 0.1     |
| Ni              | -       | -        | -         | -        | -       |
| Cu              | 0.01    | 1.0      | 1.0       | 1.0      | 1.0     |
| Zn              | 0.05    | 1.0      | 1.0       | 2.0      | 2.0     |
| As              | 0.05    | 0.05     | 0.05      | 0.1      | 0.1     |
| Cd              | 0.001   | 0.005    | 0.005     | 0.005    | 0.01    |
| Hg              | 0.00005 | 0.00005  | 0.0001    | 0.001    | 0.001   |
| Pb              | 0.01    | 0.01     | 0.05      | 0.05     | 0.1     |

**Table S5.** The categories of the Standard for Groundwater Quality (GB/T14848-2017).

| Item            | Class I | Class II  | Class III | Class IV                | Class V         |
|-----------------|---------|-----------|-----------|-------------------------|-----------------|
| pH              |         | 6.5 – 8.5 |           | 5.5 – 6.5 and 8.5 – 9.0 | < 5.5 and > 9.0 |
| SO <sub>4</sub> | 50      | 150       | 250       | 350                     | > 350           |
| Fe              | 0.1     | 0.2       | 0.3       | 2.0                     | > 2.0           |
| Mn              | 0.05    | 0.05      | 0.1       | 1.5                     | > 1.5           |
| Cr              | 0.005   | 0.01      | 0.05      | 0.1                     | > 0.1           |
| Ni              | 0.002   | 0.002     | 0.02      | 0.1                     | > 0.1           |
| Cu              | 0.01    | 0.05      | 1.0       | 1.5                     | > 1.5           |
| Zn              | 0.05    | 0.5       | 1.0       | 5.0                     | > 5.0           |
| As              | 0.001   | 0.001     | 0.01      | 0.05                    | > 0.05          |
| Cd              | 0.0001  | 0.001     | 0.005     | 0.01                    | > 0.01          |
| Hg              | 0.0001  | 0.0001    | 0.001     | 0.002                   | > 0.002         |
| Pb              | 0.005   | 0.005     | 0.01      | 0.1                     | > 0.1           |

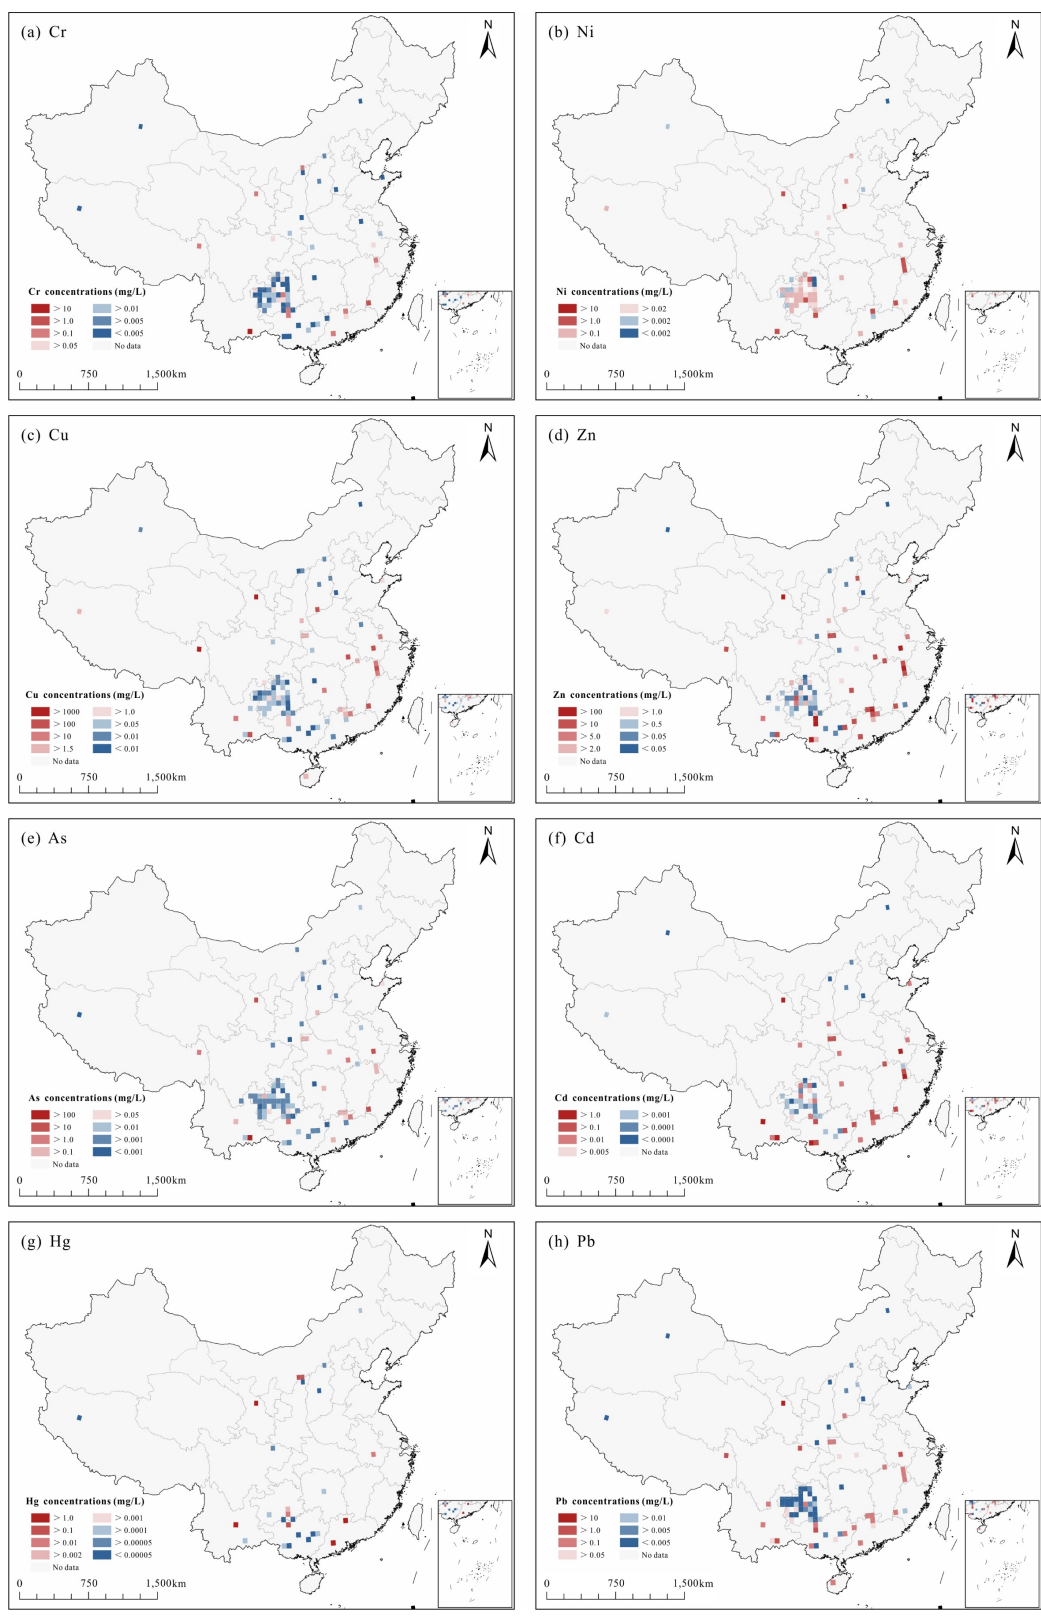

**Figure S4.** Spatial distributions of mean concentrations (mg/L) of single component (a) Cr, (b) Ni, (c) Cu, (d) Zn, (e) As, (f) Cd, (g) Hg, and (h) Pb in mining-affected water on the 0.5° grid.

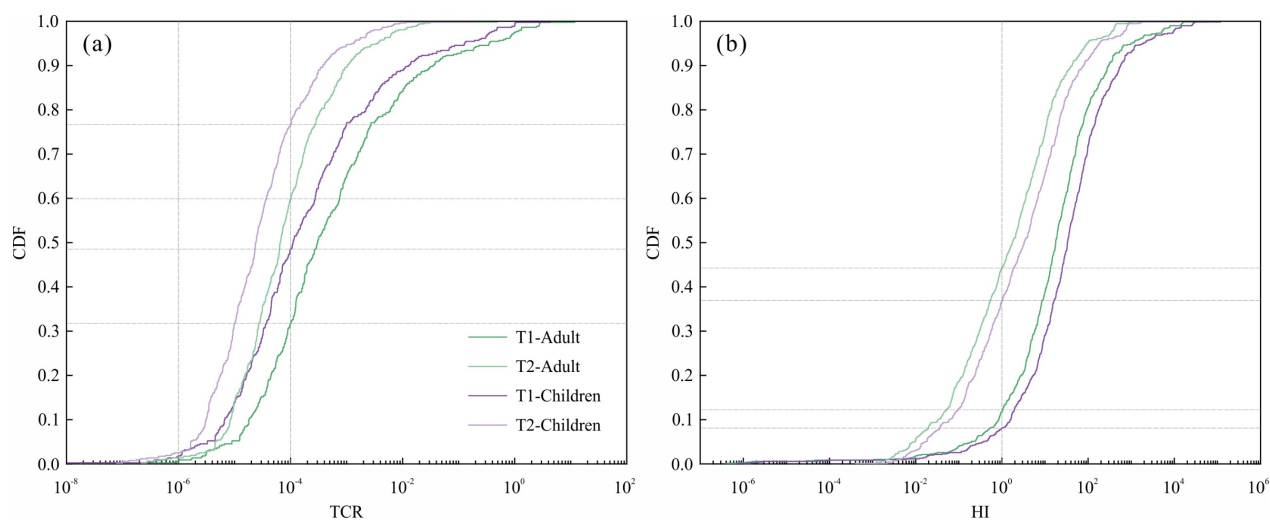

81

82 **Figure S5.** The cumulative distribution function (CDF) of (a) total carcinogenic risk (TCR) and (b)  
83 hazard index (HI) in mining-affected water. T1 includes the mine drainage, mine water, and  
84 leachate water, while T2 indicates the mining-affected surface water and groundwater.

85

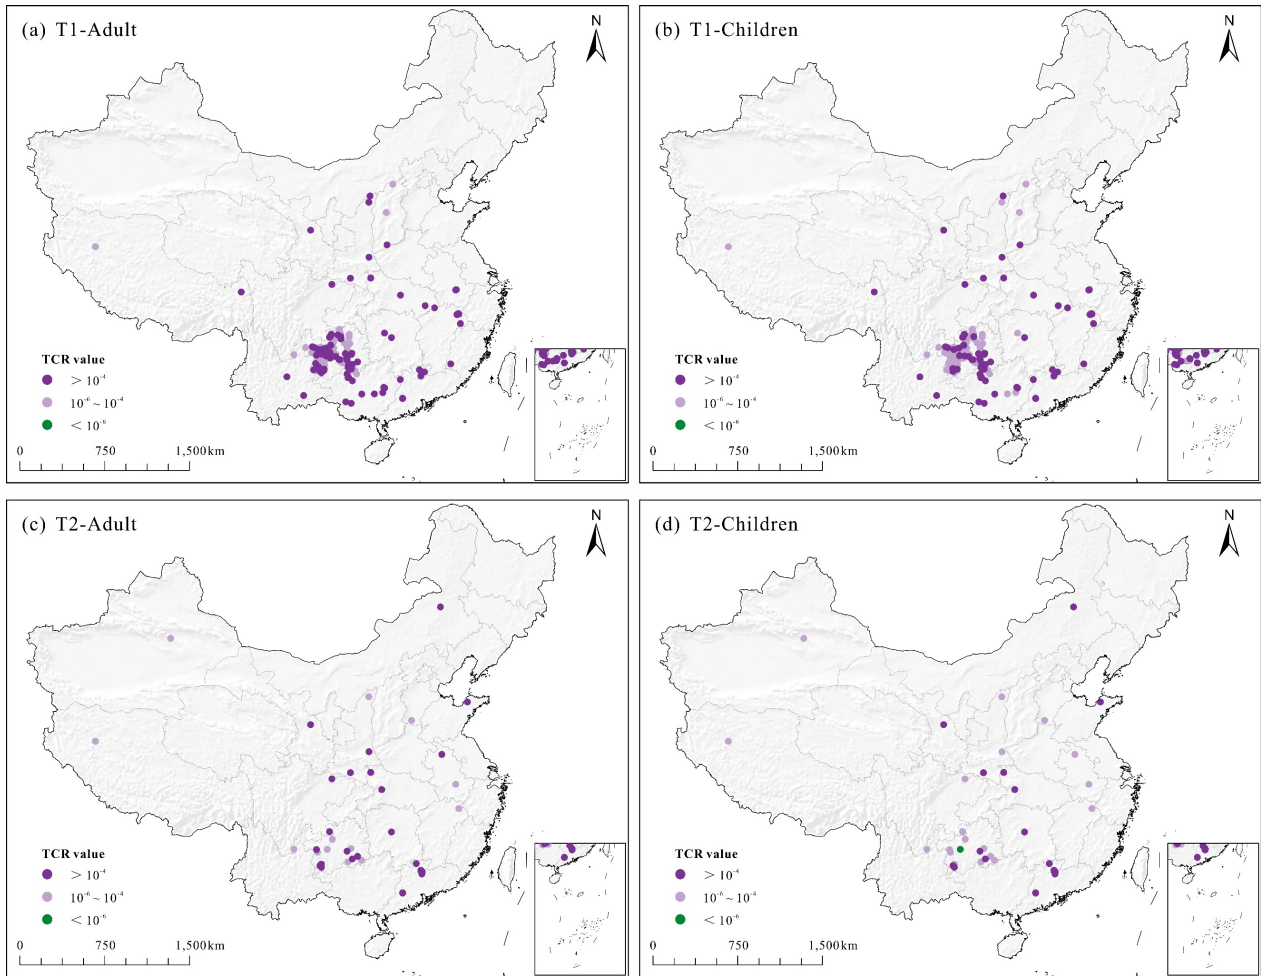

**Figure S6.** The spatial distributions of TCR levels for (a) T1-Adult, (b) T1-Children, (c) T2-Adult, and (d) T2-Children. T1 includes the mine drainage, mine water, and leachate water, while T2 indicates the mining-affected surface water and groundwater.

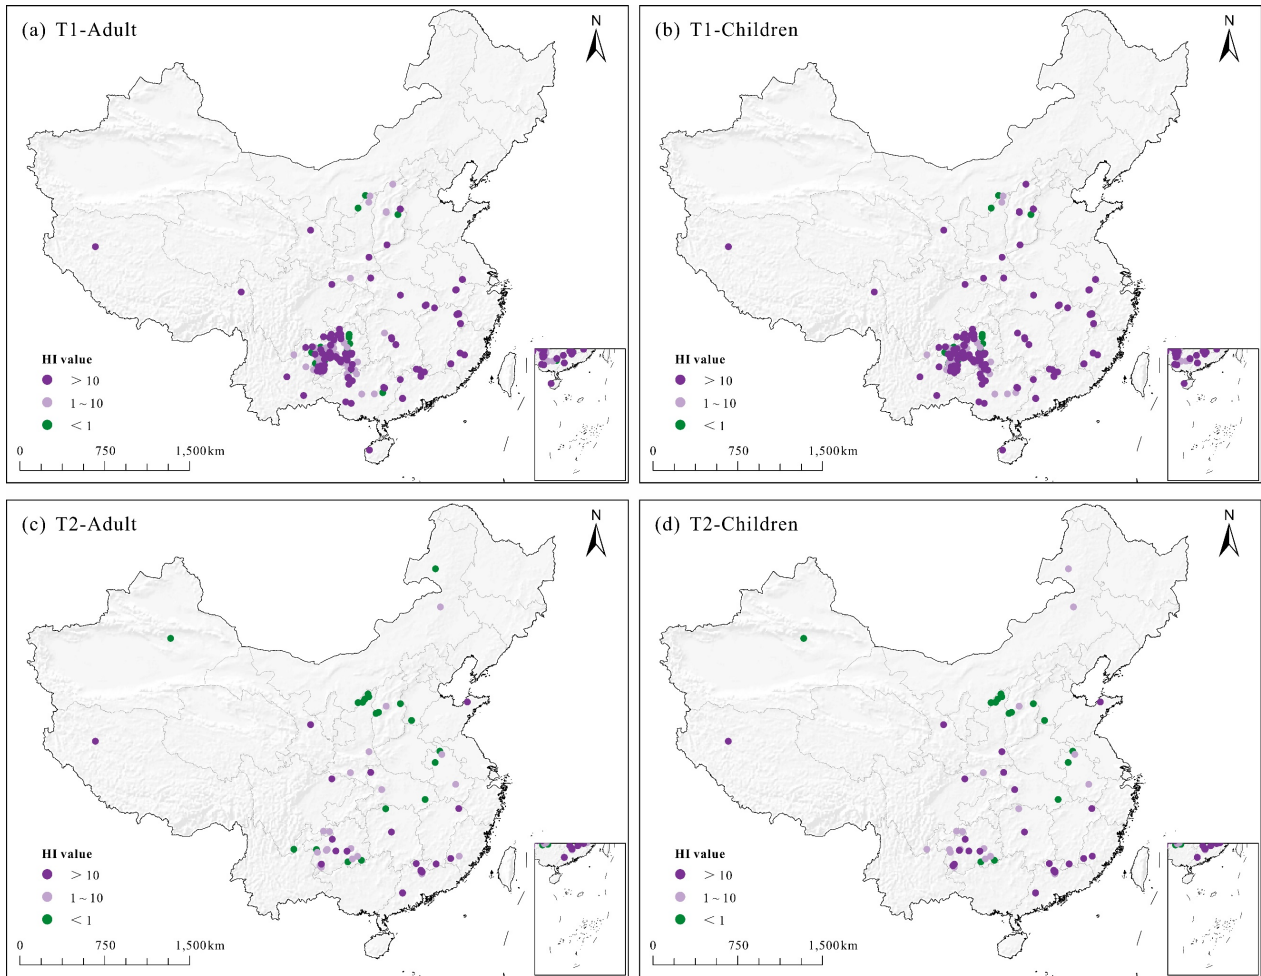

**Figure S7.** The spatial distributions of HI levels for (a) T1-Adult, (b) T1-Children, (c) T2-Adult, and (d) T2-Children. T1 includes the mine drainage, mine water, and leachate water, while T2 indicates the mining-affected surface water and groundwater.

## 96    **References**

- 97    [1]    Bao, Y., Guo, C., Wang, H., Lu, G., Yang, C., Chen, M., Dang, Z., 2017. Fe- and S-  
98            metabolizing microbial communities dominate an AMD-contaminated river ecosystem and  
99            play important roles in Fe and S cycling. *Geomicrobiol. J.*, 34(8), 695-705.  
100           <https://doi.org/10.1080/01490451.2016.1243596>.
- 101    [2]    Cao, L.H., 2007. Research on the structure of microbial communities of acid mine drainage  
102            of Yinshan lead-zinc mine. Central South University, Hunan, China (in Chinese with  
103            English abstract).
- 104    [3]    Cao, X., Zhou, S., Xie, F., Rong, R., Wu, P., 2019a. The distribution of rare earth elements  
105            and sources in Maoshitou reservoir affected by acid mine drainage, Southwest China. *J.*  
106            *Geochem. Explor.*, 202, 92-99. <https://doi.org/10.1016/j.gexplo.2019.03.019>.
- 107    [4]    Cao, Z.M., Banda, J.F., Pei, L.X., Wei, P.F., Xin, R.R., Dong, H.Y., Hao, C.B., 2019b.  
108            Microbial community structure characteristics in different mine drainage lakes of an iron  
109            mine in Anhui Province. *Acta Microbiologica Sinica*, 59(6), 1076-1088 (in Chinese with  
110            English abstract). <https://doi.org/10.13343/j.cnki.wsxb.20180560>.
- 111    [5]    Chai, Y., Bai, M., Chen, A., Yuan, J., Peng, L., Shao, J., Zhang, J., Qin, P., Peng, C., Zhou,  
112            Z., 2022. Introduction of acid mine drainage in the direct production of 5-hydroxy-  
113            methylfurfural from raw biomass and expanding the use of biomass conversion residue.  
114            *Bioresour. Technol.*, 364, 128094. <https://doi.org/10.1016/j.biortech.2022.128094>.
- 115    [6]    Chang, W., Ke, X., Wang, W., Liu, P., 2024. Identifying sources of acid mine drainage and  
116            major hydrogeochemical processes in abandoned mine adits (Southeast Shaanxi, China).  
117            *Environ. Geochem. Health*, 46, 60. <https://doi.org/10.1007/s10653-024-01858-y>.

- [7] Chen, A., Lin, C., Lu, W., Wu, Y., Ma, Y., Li, J., Zhu, L., 2007. Well water contaminated by acidic mine water from the Dabaoshan Mine, South China: Chemistry and toxicity. *Chemosphere*, 70, 248-255. <https://doi.org/10.1016/j.chemosphere.2007.06.041>.
- [8] Chen, C., Li, B., Zhu, M., Wang, X., Liu, G., Deng, Y., 2023a. Multi-isotope identification of key hydrogeochemical processes and pollution pathways of groundwater in abandoned mining areas in Southwest China. *Environ. Sci. Pollut. Res.*, 30, 78198-78215. <https://doi.org/10.1007/s11356-023-27607-9>.
- [9] Chen, D., Chen, Y.-P., Lin, Y., 2021a. Heavy rainfall events following the dry season elevate metal contamination in mining-impacted rivers: A case study of Wenyu River, Qinling, China. *Arch. Environ. Contam. Toxicol.*, 81, 335-345. <https://doi.org/10.1007/s00244-021-00870-y>.
- [10] Chen, D., Zhang, J., Chen, Y., 2021b. Ecotoxicity assessment of a molybdenum mining effluent using acute lethal, oxidative stress, and osmoregulatory endpoints in zebrafish (*Danio rerio*). *Environ. Sci. Pollut. Res.*, 28, 5137-5148. <https://doi.org/10.1007/s11356-020-10841-w>.
- [11] Chen, D., Zhang, Y., Feng, Q., 2023b. Hydrochemical characteristics and microbial community evolution of Pinglu River affected by regional abandoned coal mine drainage, Guizhou Province, China. *Environ. Sci. Pollut. Res.*, 30, 70671-70687. <https://doi.org/10.1007/s11356-023-27403-5>.
- [12] Chen, J.Y., 2019. Risk assessment of groundwater pollution of heavy metal in lead-zinc mine area in Daliangzi, Sichuan Province. Chengdu University of Technology, Chengdu, China (in Chinese with English abstract).



- [13] Chen, K., Liu, Q., Yang, T., Ju, Q., Feng, Y., 2022a. Statistical analyses of hydrochemistry in multi-aquifers of the Pansan coalmine, Huainan coalfield, China: implications for water-rock interaction and hydraulic connection. *Heliyon*, 8, e10690. <https://doi.org/10.1016/j.heliyon.2022.e10690>.
- [14] Chen, K., Sun, L., Xu, J., 2021c. Statistical analyses of groundwater chemistry in the Qingdong coalmine, northern Anhui province, China: implications for water-rock interaction and water source identification. *Appl. Water Sci.*, 11, 50. <https://doi.org/10.1007/s13201-021-01378-5>.
- [15] Chen, L.-W., Xu, X.-C., Wang, J., Chen, F., 2014. Distribution of heavy metals in Xiangsi River Valley of Tongling, China. *Environmental Science*, 35(8), 2967-2973 (in Chinese with English abstract). <https://doi.org/10.13227/j.hjkx.2014.08.018>.
- [16] Chen, M., Lu, G., Guo, C., Yang, C., Wu, J., Huang, W., Yee, N., Dang, Z., 2015. Sulfate migration in a river affected by acid mine drainage from the Dabaoshan mining area, South China. *Chemosphere*, 119, 734-743. <https://doi.org/10.1016/j.chemosphere.2014.07.094>.
- [17] Chen, M., Lu, G., Wu, J., Yang, C., Niu, X., Tao, X., Shi, Z., Yi, X., Dang, Z., 2018a. Migration and fate of metallic elements in a waste mud impoundment and affected river downstream: A case study in Dabaoshan Mine, South China. *Ecotoxicol. Environ. Safe.*, 164, 474-483. <https://doi.org/10.1016/j.ecoenv.2018.08.063>.
- [18] Chen, M., Wu, Y., 2012. Quality evaluation and chemical features analysis of shallow groundwater in lead zinc mine mountain of Shuicheng, Guizhou. *Journal of Hubei University (Natural Science)*, 34(3), 308-312 (in Chinese with English abstract).

- [19] Chen, L., Zhang, H., Xie, Z., Ding, M., Devlin, A.T., Jiang, Y., Xie, K., 2022b. The temporal response of dissolved heavy metals to landscape indices in the Le'an river, China. *Environ. Res.*, 210, 112941. <https://doi.org/10.1016/j.envres.2022.112941>.
- [20] Chen, S., Gui, H., 2017. Hydrogeochemical characteristics of groundwater in the coal-bearing aquifer of the Wugou coal mine, northern Anhui Province, China. *Appl. Water Sci.*, 7, 1903-1910. <https://doi.org/10.1007/s13201-015-0365-0>.
- [21] Chen, S., Liu, J., Wang, F., Zhou, J., Tang, P., Gao, Z., 2022c. Hydrochemical analysis of groundwater in coastal coal mining areas - A case study of the Liangjia coal mine, North China. *Mine Water Environ.*, 41, 415-427. <https://doi.org/10.1007/s10230-022-00855-w>.
- [22] Chen, T., Lei, C., Yan, B., Li, L.-L., Xu, D.-M., Ying, G.-G., 2018b. Spatial distribution and environmental implications of heavy metals in typical lead (Pb)-zinc (Zn) mine tailings impoundments in Guangdong Province, South China. *Environ. Sci. Pollut. Res.*, 25, 36702-36711. <https://doi.org/10.1007/s11356-018-3493-x>.
- [23] Chen, X., Zhang, H., Cai, Y., 2023c. Hydrochemical characteristics and processes of groundwater in the Cenozoic pore aquifer under coal mining. *Environ. Sci. Pollut. Res.*, 30, 33334-33348. <https://doi.org/10.1007/s11356-022-24561-w>.
- [24] Chen, X., Zheng, L., Dong, X., Jiang, C., Wei, X., 2020. Sources and mixing of sulfate contamination in the water environment of a typical coal mining city, China: evidence from stable isotope characteristics. *Environ. Geochem. Health*, 42, 2865-2879. <https://doi.org/10.1007/s10653-020-00525-2>.

- [25] Chen, Y., 2019. Karst spring water pollution by abandoned coal mines - a case of Longdong spring pollution. China University of Mining & Technology, Xuzhou, China (in Chinese with English abstract).
- [26] Chen, Y., Gui, H., Jiang, C., Zha, J., Zheng, L., 2022d. Hydrogeochemistry and stable hydrogen and oxygen isotope characteristics of deep limestone water in the Huainan Panxie mining area. Arab. J. Geosci., 15, 1133. <https://doi.org/10.1007/s12517-022-10401-1>.
- [27] Chen, Y., Hao, C., Liu, M., He, K., Wang, Z., 2022e. Seasonal cause analysis and irrigation risk of high fluoride mine drainage in Shendong mine area. Science Technology and Engineering, 22(34), 15052-15061 (in Chinese with English abstract).
- [28] Chen, Z., 2023. Analysis of water chemistry and isotope characteristics and water supply relationship in the middle of the Yellow River coal mining basin. East China University of Technology, Nanchang, China (in Chinese with English abstract).
- [29] Chen, Z., Liu, F., Zhu, J., 2016. Cumulative effects assessment of Fe and Mn's migration in gangue yard of a cultivated land. Earth and Environment, 44(2), 185-192 (in Chinese with English abstract). <https://doi.org/10.14050/j.cnki.1672-9250.2016.02.006>.
- [30] Chi, G.L., Zhao, Y., Guan, Z.Y., Wang, J.W., Tong, X.L., 2009. Responses of leaf-litter decomposition rate to acid mine drainage pollution. Chinese Journal of Ecology, 28(12), 2579-2585 (in Chinese with English abstract). <https://doi.org/10.13292/j.1000-4890.2009.0396>.
- [31] Dai, B., Guo, Q., Chen, Z., Zhang, X., Yu, R., 2023. Groundwater isotope hydrochemical characteristics and the interactions between precipitation river and ground water in the

Wulanmulun River Basin. Journal of Water Resources & Water Engineering, 34(4), 15-22  
(in Chinese with English abstract). <https://doi.org/10.11705/j.issn.1672-643X.2023.04.03>.

[32] Deng, W., 2009. Impact and evaluation of coal mine gangue on the surrounding water  
environment influenced by the closure of the coal mine in Maiping. Guizhou University,  
Guiyang, China (in Chinese with English abstract).

[33] Diao, H.Z., Yu, S., Li, H.L., Yin, X.Z., Zhou, J.W., Liu, H., Wang, Y.X., 2023. Analysis on  
the hydrochemical and sulfur isotope characteristics of the groundwater in cross-strata  
pollution control area of Hongshan and Zhaili coal mines in Zibo. Carsologica Sinica, 42(1),  
171-181 (in Chinese with English abstract). <https://doi.org/10.11932/karst20230113>.

[34] Ding, K., Xiang, L., Shen, R., 2023a. Analysis of groundwater environmental characteristics  
and pollution sources of Daye Mine and surrounding areas. Environmental Pollution &  
Control, 45(9), 1282-1286+1293 (in Chinese with English abstract).  
<https://doi.org/10.15985/j.cnki.1001-3865.2023.09.016>.

[35] Ding, Y., Qi, P., Sun, M., Zhong, M., Zhang, Y., Zhang, L., Xu, Z., Sun, Y., 2023b. Dissolved  
organic matter composition and fluorescence characteristics of the river affected by coal  
mine drainage. Environ. Sci. Pollut. Res., 30, 55799-55815. <https://doi.org/10.1007/s11356-023-26211-1>.

[36] Dong, F., Yin, H., Cheng, W., Li, Y., Qiu, M., Zhang, C., Tang, R., Xu, G., Zhang, L., 2022.  
Study on water inrush pattern of Ordovician limestone in North China Coalfield based on  
hydrochemical characteristics and evolution processes: A case study in Binhu and  
Wangchao Coal Mine of Shandong Province, China. J. Clean. Product., 380, 134954.  
<https://doi.org/10.1016/j.jclepro.2022.134954>.

- [37] Dong, S., Feng, H., Xia, M., Li, Y., Wang, C., Wang, L., 2020. Spatial-temporal evolutions of groundwater environment in prairie opencast coal mine area: a case study of Yimin Coal Mine, China. *Environ. Geochem. Health*, 42, 3101-3118. <https://doi.org/10.1007/s10653-020-00544-z>.
- [38] Du, S., Jiang, Z., Li, H., Chu, C., Huang, W., Zheng, L., 2023. Geochemical characteristics of rare earth elements in groundwater of Banji coal mine. *Energy Environmental Protection*, 37(6), 167-174. <https://doi.org/10.20078/j.eep.20231009>.
- [39] Duan, J., Zhao, J., Ren, H., Li, X., 2018. Analysis of water quality pollution factors and variation in Yudong River Valley, Kaili City, Guizhou. *Coal Geology of China*, 30(6), 96-100+118 (in Chinese with English abstract). <https://doi.org/10.3969/j.issn.1674-1803.2018.06.19>.
- [40] Feng, H., Zhou, J., Chai, B., Zhou, A., Li, J., Zhu, H., Chen, H., Su, D., 2020. Groundwater environmental risk assessment of abandoned coal mine in each phase of the mine life cycle: a case study of Hongshan coal mine, North China. *Environ. Sci. Pollut. Res.*, 27, 42001-42021. <https://doi.org/10.1007/s11356-020-10056-z>.
- [41] Feng, Z., 2023. Study on the characteristics of groundwater hydrochemical evolution and water quality evaluation in Yushen mining area. Chang'an University, Xi'an, China (in Chinese with English abstract).
- [42] Gao, H.Y., Xu, Z.M., Wang, K., Ren, Z., Yang, K., Tang, Y.J., Tian, L., Chen, J.P., 2019. Evaluation of the impact of karst depression-type impoundments on the underlying karst water systems in the Gejiu mining district, southern Yunnan, China. *Bull. Eng. Geol. Environ.*, 78, 4673-4688. <https://doi.org/10.1007/s10064-019-01465-7>.

- [43] Gao, J., Wang, D., 2014. Discussion on mine water quality characteristics and treatment techniques in Guizhou coalmine areas. *Coal Geology of China*, 26(5), 49-67 (in Chinese with English abstract). <https://doi.org/10.3969/j.issn.1674-1803.2014.05.12>.
- [44] Gao, K., Zhang, B., Liu, C., 2023. Characteristics and mechanisms of heavy metal pollution in acid mine drainage environments. *Environmental Science & Technology*, 46(6), 78-84 (in Chinese with English abstract). <https://doi.org/10.19672/j.cnki.1003-6504.0216.23.338>.
- [45] Gong, M., 2023. Distribution characteristics of sulfur-oxygen isotope and identification of groundwater pollution in Taiyuan Xishan mining area. *China University of Mining & Technology*, Xuzhou, China (in Chinese with English abstract).
- [46] Gu, H., Ma, F., Guo, J., Li, K., Lu, R., 2017. Hydrochemistry, multidimensional statistics, and rock mechanics investigations for Sanshandao Gold Mine, China. *Arab. J. Geosci.*, 10, 62. <https://doi.org/10.1007/s12517-017-2841-3>.
- [47] Gu, H., Ni, H., Wang, Y., Liu, Y., Li, D., Zhang, Z., 2020. Hydrogeochemical characteristics and impact of arsenic released from a gold deposit in Tibet. *Mine Water Environ.*, 39, 746-757. <https://doi.org/10.1007/s10230-020-00732-4>.
- [48] Guan, H., 2008. Analysis of microbial communities in mine drainages of Da Chang lead-zinc mine, and influence of different culture conditions on community. *Central South University*, Hunan, China (in Chinese with English abstract).
- [49] Guan, Z., Jia, Z., Zhao, Z., You, Q., 2019. Identification of inrush water recharge sources using hydrochemistry and stable isotopes: A case study of Mindong No. 1 coal mine in north-east Inner Mongolia, China. *J. Earth Syst. Sci.*, 128, 200. <https://doi.org/10.1007/s12040-019-1232-4>.

- 268 [50] Guo, Q., Yang, Y., Han, Y., Li, J., Wang, X., 2019. Assessment of surface-groundwater  
269 interactions using hydrochemical and isotopic techniques in a coalmine watershed, NW  
270 China. *Environ. Earth Sci.*, 78, 91. <https://doi.org/10.1007/s12665-019-8053-2>.
- 271 [51] Guo, Q., Zhang, Q., Li, Z., Li, F., Wang, F., 2023. Water chemistry and nitrogen and oxygen  
272 isotope techniques for tracing nitrate sources and transformation processes in ionic rare  
273 earth mining areas. *Peral River*, 44(5), 81-96 (in Chinese with English abstract).  
274 <https://doi.org/10.3969/j.issn.1001-9235.2023.05.011>.
- 275 [52] Hao, C., Huang, Y., Ma, D.-J., Fan, X., 2020. Hydro-geochemistry evolution in Ordovician  
276 limestone water induced by mountainous coal mining: A case study from North China. *J.*  
277 *Mt. Sci.* 17(3), 614-623. <https://doi.org/10.1007/s11629-019-5485-9>.
- 278 [53] Hao, C., Liu, M., Peng, Y., Wei, Z., 2022. Comparison of antimony sources and  
279 hydrogeochemical processes in shallow and deep groundwater near the Xikuangshan mine,  
280 Hunan Province, China. *Mine Water Environ.*, 41, 194-209. [https://doi.org/10.1007/s10230-](https://doi.org/10.1007/s10230-021-00833-8)  
281 [021-00833-8](https://doi.org/10.1007/s10230-021-00833-8).
- 282 [54] Hao, C., Wang, L., Gao, Y., Zhang, L., Dong, H., 2010. Microbial diversity in acid mine  
283 drainage of Xiang Mountain sulfide mine, Anhui Province, China. *Extremophiles*, 14, 465-  
284 474. <https://doi.org/10.1007/s00792-010-0324-5>.
- 285 [55] Hao, C., Wei, P., Pei, L., Du, Z., Zhang, Y., Lu, Y., Dong, H., 2017. Significant seasonal  
286 variations of microbial community in an acid mine drainage lake in Anhui Province, China.  
287 *Environ. Pollut.*, 223, 507-516. <https://doi.org/10.1016/j.envpol.2017.01.052>.

- [56] Hao, C., Zhang, L., Wang, L., Li, S., Dong, H., 2012. Microbial community composition in acid mine drainage lake of Xiang Mountain sulfide mine in Anhui Province, China. *Geomicrobiol. J.*, 29(10), 886-895, <https://doi.org/10.1080/01490451.2011.635762>.
- [57] Hao, X., Wang, D., Wang, P., Wang, Y., Zhou, D., 2016. Evaluation of water quality in surface water and shallow groundwater: a case study of a rare earth mining area in southern Jiangxi Province, China. *Environ. Monit. Assess.*, 188, 24. <https://doi.org/10.1007/s10661-015-5025-1>.
- [58] He, J., Li, W., Liu, J., Chen, S., Frost, R.L., 2019. Investigation of mineralogical and bacteria diversity in Nanxi River affected by acid mine drainage from the closed coal mine: Implications for characterizing natural attenuation process. *Spectrochimica Acta A*, 217, 263-270. <https://doi.org/10.1016/j.saa.2019.03.069>.
- [59] He, L., Lyu, G., Hu, A., Yang, L., Guo, Y., Li, G., 2022. Mine water bursting water source discrimination based on hydrochemical features analysis. *Coal Geology of China*, 34(6), 34-39 (in Chinese with English abstract). <https://doi.org/10.3969/j.issn.1674-1803.2022.06.07>.
- [60] He, M., Wang, Z., Tang, H., 1997. Spatial and temporal patterns of acidity and heavy metals in predicting the potential for ecological impact on the Le An river polluted by acid mine drainage. *Sci. Total Environ.*, 206, 67-77. [https://doi.org/10.1016/S0048-9697\(97\)00217-9](https://doi.org/10.1016/S0048-9697(97)00217-9).
- [61] He, M., Wang, Z., Tang, H., 1998. The chemical, toxicological and ecological studies in assessing the heavy metal pollution in Le An River, China. *Water Res.*, 32(2), 510-518. [https://doi.org/10.1016/S0043-1354\(97\)00229-7](https://doi.org/10.1016/S0043-1354(97)00229-7).



- 308 [62] He, Z., Xiao, S., Xie, X., Zhong, H., Hu, Y., Li, Q., Gao, F., Li, G., Liu, J., Qiu, G., 2007a.  
309 Molecular diversity of microbial community in acid mine drainages of Yunfu sulfide mine.  
310 Extremophiles 11, 305-314. <https://doi.org/10.1007/s00792-006-0044-z>.
- 311 [63] He, Z., Xie, X., Xiao, S., Liu, J., Qiu, G., 2007b. Microbial diversity of mine water at Zhong  
312 Tiaoshan copper mine, China. J. Basic Microbiol., 47, 485-495.  
313 <https://doi.org/10.1002/jobm.200700219>.
- 314 [64] Hong, T., Ma, Z., Ou, M., Qin, X., Yang, L., Cheng, R., 2017. Hydrochemical characteristics  
315 of groundwater and the source analysis of the mining water in Yangliu street mine. Industrial  
316 Safety and Environmental Protection, 43(7), 83-88 (in Chinese with English abstract).
- 317 [65] Hou, Z., Huang, L., Zhang, S., Han, X., Xu, J., Li, Y., 2024. Identification of groundwater  
318 hydrogeochemistry and the hydraulic connections of aquifers in a complex coal mine. J.  
319 Hydrol., 628, 130496. <https://doi.org/10.1016/j.jhydrol.2023.130496>.
- 320 [66] Huang, J., 2023. Study on Hydrochemical characteristics of Longde coal mine and influence  
321 of coal mining on groundwater. Liaoning Technical University, Fuxin, China (in Chinese  
322 with English abstract).
- 323 [67] Huang, P., Chen, J., 2012. Recharge sources and hydrogeochemical evolution of  
324 groundwater in the coal-mining district of Jiaozuo, China. Hydrogeol. J., 20, 739-754.  
325 <https://doi.org/10.1007/s10040-012-0836-4>.
- 326 [68] Huang, W., 2021. Hydrogeological research on the treatment of acidic water in the old  
327 tunnels of Dexing copper mine. Chengdu University of Technology, Chengdu, China (in  
328 Chinese with English abstract).

- [69] Huang, X., Deng, H., Zheng, C., Cao, G., 2016a. Hydrogeochemical signatures and evolution of groundwater impacted by the Bayan Obo tailing pond in northwest China. *Sci. Total Environ.*, 543, 357-372. <https://doi.org/10.1016/j.scitotenv.2015.10.150>.
- [70] Huang, X., Li, N., Wu, Q., Long, J., Luo, D., Zhang, P., Yao, Y., Huang, X., Li, D., Lu, Y., Liang, J., 2016b. Risk assessment and vertical distribution of thallium in paddy soils and uptake in rice plants irrigated with acid mine drainage. *Environ. Sci. Pollut. Res.*, 23, 24912-24921. <https://doi.org/10.1007/s11356-016-7679-9>.
- [71] Huang, Y., Li, X.-T., Jiang, Z., Liang, Z.-L., Wang, P., Liu, Z.-H., Li, L.-Z., Yin, H.-Q., Jia, Y., Huang, Z.-S., Liu, S.-J., Jiang, C.-Y., 2021. Key factors governing microbial community in extremely acidic mine drainage (pH<3). *Front. Microbiol.*, 12, 761579. <https://doi.org/10.3389/fmicb.2021.761579>.
- [72] Hussain, R., Wei, C., Luo, K., 2019. Hydrogeochemical characteristics, source identification and health risks of surface water and groundwater in mining and non-mining areas of Handan, China. *Environ. Earth Sci.*, 78, 402. <https://doi.org/10.1007/s12665-019-8350-9>.
- [73] Jiang, C., Cheng, L., Li, C., Zheng, L., 2022. A hydrochemical and multi-isotopic study of groundwater sulfate origin and contribution in the coal mining area. *Ecotoxicol. Environ. Safe.*, 248, 114286. <https://doi.org/10.1016/j.ecoenv.2022.114286>.
- [74] Jiang, C., Li, M., Li, C., Huang, W., Zheng, L., 2023. Combining hydrochemistry and <sup>13</sup>C analysis to reveal the sources and contributions of dissolved inorganic carbon in the groundwater of coal mining areas, in East China. *Environ. Geochem. Health*, 45, 7065-7080. <https://doi.org/10.1007/s10653-023-01726-1>.

- [75] Jiang, Q., 2007. Study on characteristics, mechanism experiments and preventions of acid mine drainage. Anhui University of Science and Technology, Huainan, China (in Chinese with English abstract).
- [76] Jiang, Q., Liu, Q., Liu, Y., Chai, H., Zhu, J., 2024. Groundwater chemical characteristic analysis and water source identification model study in Gubei coal mine, Northern Anhui Province, China. *Heliyon*, 10, e26925. <https://doi.org/10.1016/j.heliyon.2024.e26925>.
- [77] Jiang, W.X., Jia, X.H., Tang, T., Cai, Q.H., 2016. Response of macroinvertebrate functional feeding groups to acid mine drainage in the Gaolan River. *Acta Ecologica Sinica*, 36(18), 5670-5681 (in Chinese with English abstract). <https://doi.org/10.5846/stxb201504140760>.
- [78] Jiao, Y., Liu, Y., Wang, W., Li, Y., Chang, W., Zhou, A., Mu, R., 2023. Heavy metal distribution characteristics, water quality evaluation, and health risk evaluation of surface water in abandoned multi-year pyrite mine area. *Water*, 15, 3138. <https://doi.org/10.3390/w15173138>.
- [79] Ju, Q., Hu, Y., Liu, Q., Chai, H., Chen, K., Zhang, H., Wu, Y., 2023. Source apportionment and ecological health risks assessment of major ions, metalloids and trace elements in multi-aquifer groundwater near Sunan mine area, eastern China. *Sci. Total Environ.*, 860, 160454. <https://doi.org/10.1016/j.scitotenv.2022.160454>.
- [80] Ju, Q., Hu, Y., Liu, Q., Chai, H., Chen, K., Zhang, H., Wu, Y., 2024. Multiple stable isotopes and geochemical approaches to elucidate reactive transport paths in mining cities: A case from the northern Anhui, China. *Sci. Total Environ.*, 912, 169706. <https://doi.org/10.1016/j.scitotenv.2023.169706>.

- [81] Kuang, J.L., Huang, L.N., Chen, L.X., Hua, Z.-S., Li, S.-J., Hu, M., Li, J.-T., Shu, W.-S., 2013. Contemporary environmental variation determines microbial diversity patterns in acid mine drainage. *ISME J.*, 7, 1038-1050. <https://doi.org/10.1038/ismej.2012.139>.
- [82] Kuang, J.L., Huang, L.N., He, Z.L., Chen, L.X., Hua, Z.S., Jia, P., Li, S.J., Liu, J., Li, J.T., Zhou, J.Z., Shu, W.S., 2016. Predicting taxonomic and functional structure of microbial communities in acid mine drainage. *ISME J.*, 10, 1527-1539. <https://doi.org/10.1038/ismej.2015.201>.
- [83] Kang, X., Li, X., Rao, L., Zhang, W., Luo, X., Wang, K., 2023. Source identification and pattern study of closed coal mines water inflow in Songzao mining area, Chongqing City. *Coal Science and Technology*, 51(10), 220-230 (in Chinese with English abstract). <https://doi.org/10.13199/j.cnki.cst.2022-1640>.
- [84] Li, B., Liu, G., Nie, Y., Ye, Z., 2021a. Causes and effects of a water spill from the underground pit of the Dashu pyrite mine, Southern Sichuan Basin, Southwest China. *Mine Water Environ.*, 40, 864-876. <https://doi.org/10.1007/s10230-021-00825-8>.
- [85] Li, B., Liu, G., Nie, Y., Ye, Z., Yang, Z., Yin, G., 2020. Hydrochemical characteristics and environmental isotope analysis of typical abandoned pyrite in southwest China. *Environmental Science & Technology*, 43(10), 10-17 (in Chinese with English abstract). <https://doi.org/10.19672/j.cnki.1003-6504.2020.10.002>.
- [86] Li, B., Wang, X., Liu, G., Zheng, L., Cheng, C., 2022a. Microbial diversity response to geochemical gradient characteristics on AMD from abandoned Dashu pyrite mine in Southwest China. *Environ. Sci. Pollut. Res.*, 29, 74983-74997. <https://doi.org/10.1007/s11356-022-21031-1>.

- [87] Li, B., Zheng, L., Yang, Z., Chen, C., Liu, G., 2023a. Identification of the sources of mine drainage in a multi aquifer area: a case study of the abandoned Dashu pyrite mine in southwest China. *Hydrogeol. J.*, 31, 387-400. <https://doi.org/10.1007/s10040-022-02559-5>.
- [88] Li, C., Wang, J., Liu, F., Liu, J., Hu, Y., Xu, Z., 2022b. Hydrochemical evolution characteristics of groundwater in Binchang Mining Area. *Coal Science & Technology Magazine*, 43(4), 102-110 (in Chinese with English abstract). <https://doi.org/10.19896/j.cnki.mtkj.2022.04.012>.
- [89] Li, F., Wei, L., Liu, Y., Deng, H., Cui, J., Wang, J., Xiao, T., 2024. Characterization of dissolved organic matter in rivers impacted by acid mine drainage: Components and complexation with metals. *Sci. Total Environ.*, 926, 171960. <https://doi.org/10.1016/j.scitotenv.2024.171960>.
- [90] Li, Guo., Di J., Lyu, Q., 2022c. Distribution characteristics and formation mechanism of high fluoride groundwater in Buertai coal mine. *Coal Engineering*, 54(7), 122-128 (in Chinese with English abstract). <https://doi.org/10.11799/ce202207022>.
- [91] Li, H., Cao, Z., Wang, L., Chi, M., Hu, B., Zhang, S., Zhou, A., 2023b. Study on chemical characteristics and evolution law of groundwater in Taigemiao Mining Area. *Coal Science and Technology*, 51(9), 284-291 (in Chinese with English abstract).
- [92] Li, H., Xiao, T.F., Shuang, Y., He, L.B., Ning, Z.P., Sun, J.L., Peng, J.Q., Li, D.H., Zhu, C.S., 2007. Hydrogeochemistry of cadmium in Jinding Pb-Zn mining district in Yunnan, China. *Geochimica*, 36(6), 633-637 (in Chinese with English abstract).
- [93] Li, L., Cao, X., Wu, P., Bu, C., Ren, Y., Li, K., 2023c. Spatio-temporal characterization of dissolved organic matter in karst rivers disturbed by acid mine drainage and its correlation

with metal ions. Sci. Total Environ., 897, 165434.

<https://doi.org/10.1016/j.scitotenv.2023.165434>.

[94] Li, L., Tu, H., Zhang, S., Wu, L., Wu, M., Tang, Y., Wu, P., 2019. Geochemical behaviors of antimony in mining-affected water environment (Southwest China). Environ. Geochem. Health, 41, 2397-2411. <https://doi.org/10.1007/s10653-019-00285-8>.

[95] Li, P., Cheng, J., Liu, J., Wang, T., Yang, J., 2022d. Hydrogeochemical characteristics and solute sources of groundwater in the Yuhengbei mining area, Shaanxi Province, China. Environ. Earth Sci., 81, 516. <https://doi.org/10.1007/s12665-022-10551-1>.

[96] Li, Q., An, L., Wu, P., Wang, S., Gu, S., Yuan, Y., Fu, Y., 2023d. The introduction of nitrogen from coal into the surface watershed nitrogen cycle due to coal mining activity. Sci. Total Environ., 900, 165822. <https://doi.org/10.1016/j.scitotenv.2023.165822>.

[97] Li, Q., Wu, P., Wang, S., Huang, J., Lu, W., Tan, D., Gu, S., Fan, B., 2023e. The non-coevolution of DIC and alkalinity and the CO<sub>2</sub> degassing in a karst river affected by acid mine drainage in Southwest China. Sci. Total Environ., 900, 165856. <https://doi.org/10.1016/j.scitotenv.2023.165856>.

[98] Li, Q., Wu, P., Zha, X., Li, X., Wu, L., Gu, S., 2018a. Effects of mining activities on evolution of water chemistry in coal-bearing aquifers in karst region of Midwestern Guizhou, China: evidences from  $\delta^{13}\text{C}$  of dissolved inorganic carbon and  $\delta^{34}\text{S}$  of sulfate. Environ. Sci. Pollut. Res., 25, 18038-18048. <https://doi.org/10.1007/s11356-018-1969-3>.

[99] Li, T., Zhang, F., Meng, L., 2021b. Occurrence, distribution, and prediction of iron and manganese in groundwater of opencast mines: an example from Inner Mongolia, China. Environ. Monit. Assess., 193, 544. <https://doi.org/10.1007/s10661-021-09262-0>.

- [100] Li, X., 2018. Study on hydrogeochemical characteristics and evolution rules of Karst basin under the effects of acid mine drainage waste water. Guizhou University, Guiyang, China (in Chinese with English abstract).
- [101] Li, X., Cai, J., Chen, D., Feng, Q., 2021c. Characteristics of water contamination in abandoned coal mines: a case study on Yudong River area, Kaili, Guizhou Province, China. Int. J. Coal Sci. Technol., 8(6), 1491-1503. <https://doi.org/10.1007/s40789-021-00466-w>.
- [102] Li, X., Qiao, W., Chen, D., Wu, P., Xie, Y., Chen, X., 2023f. Anomalous concentrations of rare earth elements in acid mine drainage and implications for rare earth resources from late Permian coal seams in northern Guizhou. Sci. Total Environ., 879, 163051. <https://doi.org/10.1016/j.scitotenv.2023.163051>.
- [103] Li, X., Wu, P., 2017. Geochemical characteristics of dissolved rare earth elements in acid mine drainage from abandoned high-As coal mining area, southwestern China. Environ. Sci. Pollut. Res., 24, 20540-20555. <https://doi.org/10.1007/s11356-017-9670-5>.
- [104] Li, X., Wu, P., Han, Z., Shi, J., 2016. Sources, distributions of fluoride in waters and its influencing factors from an endemic fluorosis region in central Guizhou, China. Environ. Earth Sci., 75, 981. <https://doi.org/10.1007/s12665-016-5779-y>.
- [105] Li, X., Wu, P., Han, Z., Zha, X., Ye, H., Qin, Y., 2018b. Effects of mining activities on evolution of water quality of karst waters in Midwestern Guizhou, China: evidences from hydrochemistry and isotopic composition. Environ. Sci. Pollut. Res., 25, 1220-1230. <https://doi.org/10.1007/s11356-017-0488-y>.
- [106] Li, X., Zhang, R., Li, Q., Wu, P., Ye, H., 2021d. Rare earth elements and yttrium (REY) in coal mine drainage from Southwest China: Geochemical distribution and resource

459 evaluation. Sci. Total Environ., 782, 146904.  
 460 <https://doi.org/10.1016/j.scitotenv.2021.146904>.

461 [107] Li, X., Zhao, X., Zhou, F., Chen, Y., Huang, T., Sun, Q., 2021e. Distribution characteristics  
 462 of sulfur species and isotopes in sediments of rivers around Zhongshan tailing at Lujiang  
 463 County, Anhui Province. Environmental Chemistry, 40(6), 1787-1794 (in Chinese with  
 464 English abstract). <https://doi.org/10.7524/j.issn.0254-6108.2020020404>.

465 [108] Li, X.Q., Zhang, B., Zhou, A.G., Liu, Y.D., 2014. Using sulfur and oxygen isotopes of  
 466 sulfate to track groundwater contamination from coal mine drainage in Heshan.  
 467 Hydrogeology & Engineering Geology, 41(6), 103-109 (in Chinese with English abstract).  
 468 <https://doi.org/10.16030/j.cnki.issn.1000-3665.2014.06.019>.

469 [109] Li, Y., Wang, W., Xu, F., Huang, H., Zha, H., 2023g. Identification and quantitative analysis  
 470 of water source in Shilawusu coal mine of Hujilt mining area. Coal Geology of China, 35(8),  
 471 45-57 (in Chinese with English abstract). <https://doi.org/10.3969/j.issn.1674-1803.2023.08.08>.

472

473 [110] Li, Z., 2014. Water quality analysis and treatment technology research of acid mine drainage  
 474 from Banpo antimony mine in Guizhou province. Guizhou Normal University, Guiyang,  
 475 China (in Chinese with English abstract).

476 [111] Liang, Z.L., Qin, Y.L., Wang, P., Wang, B.J., Liu, Z.H., Yin, H.Q., Liu, S.J., Jiang, C.Y.,  
 477 2019. Microbial community structure and function in acid mine drainage from Mengzi,  
 478 Yunnan Province. Chinese Journal of Biotechnology, 35(11), 2035-2049 (in Chinese with  
 479 English abstract). <https://doi.org/10.13345/j.cjb.190506>.



- [112] Liao, J., Ru, X., Xie, B., Zhang, W., Wu, H., Wu, C., Wei, C., 2017. Multi-phase distribution and comprehensive ecological risk assessment of heavy metal pollutants in a river affected by acid mine drainage. *Ecotoxicol. Environ. Safe.*, 141, 75-84. <https://doi.org/10.1016/j.ecoenv.2017.03.009>.
- [113] Liao, L., Yang, Z., Yang, F., Zhang, H., Wang, C., Mao, Z., Pang, L., Wu, Y., 2021. Environmental problems and countermeasures of AMD in pyrite and high-sulfur coals in Southwest China. *Journal of Chengdu University of Technology (Science & Technology Edition)*, 48(6), 754-761 (in Chinese with English abstract). <https://doi.org/10.3969/j.issn.1671-9727.2021.06.13>.
- [114] Lin, C., Wu, Y., Lu, W., Chen, A., Liu, Y., 2007. Water chemistry and ecotoxicity of an acid mine drainage-affected stream in subtropical China during a major flood event. *J. Hazard. Mater.*, 142, 199-207. <https://doi.org/10.1016/j.jhazmat.2006.08.006>.
- [115] Lin, M.-L., Peng, W.-H., Gui, H.-R., 2016. Hydrochemical characteristics and quality assessment of deep groundwater from the coal-bearing aquifer of the Linhuan coal-mining district, Northern Anhui Province, China. *Environ. Monit. Assess.*, 188, 202. <https://doi.org/10.1007/s10661-016-5199-1>.
- [116] Liu, B., Meng, F., Xue, J., Guo, J., Luo, A., 2023a. Analysis on chemical characteristics and hydraulic connection degree of groundwater in Yushuquan Mining Area. *China Energy and Environmental Protection*, 45(8), 73-79 (in Chinese with English abstract). <https://doi.org/10.19389/j.cnki.1003-0506.2023.08.014>.
- [117] Liu, B., Wang, Y., Hao, C., 2023b. Spatial distribution and formation mechanism of high fluoride mine water in Halagou Coal Mine. *Coal Processing & Comprehensive Utilization*,

6, 94-100 (in Chinese with English abstract). <https://doi.org/10.16200/j.cnki.11-2627/td.2023.06.023>.

[118] Liu, F., Wang, G., Li, B., Wang, C., Qu, S., Liao, F., 2024. Rare earth element behaviors of groundwater in overlying aquifers under the influence of coal mining in northern Ordos Basin, China. *Environ. Sci. Pollut. Res.*, 31, 13284-13301. <https://doi.org/10.1007/s11356-024-31958-2>.

[119] Liu, F., Zhang, X., Tang, S., Wang, M., Liu, H., 2019a. Effects of acid mine drainage on eukaryotic community in river sediments. *China Environmental Science*, 39(12), 5285-5292 (in Chinese with English abstract). <https://doi.org/10.19674/j.cnki.issn1000-6923.2019.0613>.

[120] Liu, G., Ran M., Wen, Z., Zheng, Z., 2010. Water quality characteristics and impact on karst development in a coalmine in Gulin-Xuyong Mining Area, Southern Sichuan. *Coal Geology of China*, 22(7), 36-40 (in Chinese with English abstract). <https://doi.org/10.3969/j.issn.1674-1803.2010.07.09>.

[121] Liu, J., Hao, Y., Gao, Z., Wang, M., Liu, M., Wang, Z., Wang, S., 2019b. Determining the factors controlling the chemical composition of groundwater using multivariate statistics and geochemical methods in the Xiqu coal mine, North China. *Environ. Earth Sci.*, 78, 364. <https://doi.org/10.1007/s12665-019-8366-1>.

[122] Liu, J., Jin, D., Wang, T., Gao, M., Yang, J., Wang, Q., 2019c. Hydrogeochemical processes and quality assessment of shallow groundwater in Chenqi coalfield, Inner Mongolia, China. *Environ. Earth Sci.*, 78, 347. <https://doi.org/10.1007/s12665-019-8355-4>.

- [123] Liu, J., Wang, H., Jin, D., Xu, F., Zhao, C., 2020a. Hydrochemical characteristics and evolution processes of karst groundwater in Carboniferous Taiyuan formation in the Pingdingshan coalfield. *Environ. Earth Sci.*, 79, 151. <https://doi.org/10.1007/s12665-020-8898-4>.
- [124] Liu, J., Wang, J., Chen, Y., Lippold, H., Xiao, T., Li, H., Shen, C.-C., Xie, L., Xie, X., Yang, H., 2017a. Geochemical transfer and preliminary health risk assessment of thallium in a riverine system in the Pearl River Basin, South China. *J. Geochem. Explor.* 176, 64-75. <https://doi.org/10.1016/j.gexplo.2016.01.011>.
- [125] Liu, L., 2009. The pollution characteristics of acid drainage and its chemical control methods in Guizhou coal mine areas. Guizhou University, Guiyang, China (in Chinese with English abstract).
- [126] Liu, N., Chen, A., Xu, J., Fu, J., 2022a. Hydrogeochemical simulation of groundwater in Jiaozuo mining area. *Journal of Geological Hazards and Environment Preservation*, 33(4), 121-128 (in Chinese with English abstract).
- [127] Liu, P., Hoth, N., Drebenstedt, C., Sun, Y., Xu, Z., 2017b. Hydro-geochemical paths of multi-layer groundwater system in coal mining regions - Using multivariate statistics and geochemical modeling approaches. *Sci. Total Environ.*, 601-602, 1-14. <https://doi.org/10.1016/j.scitotenv.2017.05.146>.
- [128] Liu, P., Yang, M., Sun, Y., 2019d. Hydro-geochemical processes of the deep Ordovician groundwater in a coal mining area, Xuzhou, China. *Hydrogeol. J.*, 27, 2231-2244. <https://doi.org/10.1007/s10040-019-01991-4>.

- [129] Liu, Q., Zhang, Z., Zhang, B., Mu, W., Zhang, H., Li, Y., Xu, N., 2021a. Hydrochemical analysis and identification of open-pit mine water sources: a case study from the Dagushan iron mine in Northeast China. *Sci. Rep.*, 11, 23152. <https://doi.org/10.1038/s41598-021-02609-0>.
- [130] Liu, S., Cao, X. X., Wu, P., Liao, L., Liao, J.H., 2021b. Study on characteristics of reservoir fungal community and environmental factors under the influence of acid mine drainage. *Environmental Science & Technology*, 44(2), 1-8 (in Chinese with English abstract). <https://doi.org/10.19672/j.cnki.1003-6504.2021.02.001>.
- [131] Liu, W., Liu, S., Tang, C., Qin, W., Pan, H., Zhang, J., 2020b. Evaluation of surface water quality after mine closure in the coal-mining region of Guizhou, China. *Environ. Earth Sci.*, 79, 427. <https://doi.org/10.1007/s12665-020-09167-0>.
- [132] Liu, W.-S., Guo, M.-N., Liu, C., Yuan, M., Chen, X.-T., Huot, H., Zhao, C.-M., Tang, Y.-T., Morel, J.L., Qiu, R.-L., 2019e. Water, sediment and agricultural soil contamination from an ion-adsorption rare earth mining area. *Chemosphere*, 216, 75-83. <https://doi.org/10.1016/j.chemosphere.2018.10.109>.
- [133] Liu, W.X., Coveney, R.M., Chen, J.L., 2003. Environmental quality assessment on a river system polluted by mining activities. *Appl. Geochem.*, 18, 749-764. [https://doi.org/10.1016/S0883-2927\(02\)00155-5](https://doi.org/10.1016/S0883-2927(02)00155-5).
- [134] Liu, X.X., Huo, Q., Liu, X.D., Qiu, G.Z., 2007. Diversity of microbial community in acid mine drainage in ancient mine area. *J. Cent. South Univ. (Science and Technology)*, 38(3), 414-420 (in Chinese with English abstract).

- [135] Liu, X., Zhang, R., Wan, B., 2022b. Study on mine water intrush source discrimination method based on Piper-PCA-MLP neural network. *Coal Geology of China*, 34(7), 50-55 (in Chinese with English abstract). <https://doi.org/10.3969/j.issn.1674-1803.2022.07.10>.
- [136] Liu, Y., Wei, L., Deng, H., Hu, S., Xie, X., Luo, D., Xiao, T., 2023c. Hydrogeochemistry of groundwater surrounding a pyrite mine in southern China: Assessment of the diffusive gradients in thin films technique for in situ monitoring. *J. Hydrol.*, 622, 129685. <https://doi.org/10.1016/j.jhydrol.2023.129685>.
- [137] Liu, Y., Wei, L., Wu, Q., Luo, D., Xiao, T., Wu, Q., Huang, X., Liu, J., Wang, J., Zhang, P., 2023d. Impact of acid mine drainage on groundwater hydrogeochemistry at a pyrite mine (South China): a study using stable isotopes and multivariate statistical analyses. *Environ. Geochem. Health*, 45, 771-785.
- [138] Liu, Y., Wei, L., Luo, D., Xiao, T., Lekhov, A., Xie, X., Huang, X., Su, X., 2021c. Geochemical distribution and speciation of thallium in groundwater impacted by acid mine drainage (Southern China). *Chemosphere*, 280, 130743. <https://doi.org/10.1016/j.chemosphere.2021.130743>.
- [139] Lu, C., Cheng, W., Yin, H., Li, S., Zhang, Y., Dong, F., Cheng, Y., Zhang, X., 2024. Study on inverse geochemical modeling of hydrochemical characteristics and genesis of groundwater system in coal mine area - a case study of Longwanggou Coal Mine in Ordos Basin. *Environ. Sci. Pollut. Res.*, 31, 16583-16600. <https://doi.org/10.1007/s11356-024-32153-z>.
- [140] Lu, C., Yang, B., Cui, X., Wang, S., Qu, C., Zhang, W., Zhou, B., 2021. Characteristics and environmental response of white secondary mineral precipitate in the acid mine drainage

from Jinduicheng mine, Shaanxi, China. Bull. Environ. Contam. Toxicol., 107, 1012-1021.  
<https://doi.org/10.1007/s00128-021-03355-9>.

[141] Lu, Z., Guo, Y., Li, G., Wang, L., Li, F., Zhang, Z., 2023. Water quality and health risk of surface water, groundwater and mine water in Shendong mining area. Safety and Environmental Engineering, 30(5), 222-234 (in Chinese with English abstract).  
<https://doi.org/10.13578/j.cnki.issn.1671-1556.20230273>.

[142] Luo, C., Routh, J., Dario, M., Sarkar, S., Wei, L., Luo, D., Liu, Y., 2020. Distribution and mobilization of heavy metals at an acid mine drainage affected region in South China, a post-remediation study. Sci. Total Environ., 724, 138122.  
<https://doi.org/10.1016/j.scitotenv.2020.138122>.

[143] Luo, Y., Rao, J., Jia, Q., 2022. Heavy metal pollution and environmental risks in the water of Rongna River caused by natural AMD around Tiegelongnan copper deposit, Northern Tibet, China. PLoS ONE, 17(4), e0266700. <https://doi.org/10.1371/journal.pone.0266700>.

[144] Ma, L., Banda, J.F., Wang, Y., Yang, Q., Zhao, L., Hao, C., Dong, H., 2024. Metagenomic insight into the acidophilic functional communities driving elemental geochemical cycles in an acid mine drainage lake. J. Hazard. Mater., 466, 13307.  
<https://doi.org/10.1016/j.jhazmat.2023.133070>.

[145] Ma, T., Zhou, W., Yang, X., Christie, P., Luo, Y., 2019. Risk assessment of contamination by potentially toxic metals: A case study in the vicinity of an abandoned pyrite mine. Minerals, 9, 783. <https://doi.org/10.3390/min9120783>.

[146] Mei, A., Wu, X., Zeng, Y., Zhu, G., Zhao, D., Zhang, Y., 2024. Formation processes of groundwater in a non-ferrous metal mining city of China: Insights from hydrochemical and

strontium isotope analyses. Environ. Sci. Pollut. Res., 31, 15716-15732.

<https://doi.org/10.1007/s11356-024-32186-4>.

[147] Miao, D., Yang, W., Yin, Y., Guan, L., Ayibieke, M., Su L., Dang, Y., 2024. Underground water hydrochemical characteristics and indexes of Kuangou coal mine. Shaanxi Coal, 43(1),47-51 (in Chinese with English abstract). <https://doi.org/10.20120/j.cnki.issn.1671-749x.2024.0109>.

[148] Min, M., Peng, X., Zhou, X., Qiao, H., Wang, J., Zhang, L., 2007. Hydrochemistry and isotope compositions of groundwater from the Shihongtan sandstone-hosted uranium deposit, Xinjiang, NW China. J. Geochem. Explor., 93, 91-108. <https://doi.org/10.1016/j.gexplo.2006.12.001>.

[149] Nyirenda, T.M., Zhou, J., Mapoma, H.W., Xie, L., Li, Y., 2016. Hydrogeochemical characteristics of groundwater at the Xikuangshan antimony mine in South China. Mine Water Environ., 35, 86-93. <https://doi.org/10.1007/s10230-015-0341-9>.

[150] Pan, X., Yue, Z., She, Z., He, X., Wang, S., Chuai, X., Wang, J., 2023. Eukaryotic community structure and interspecific interactions in a stratified acidic pit lake water in Anhui Province. Microorganisms, 11, 979. <https://doi.org/10.3390/microorganisms11040979>.

[151] Pan, Y., Ye, H., Li, X., Yi, X., Wen, Z., Wang, H., Lu, G., Dang, Z., 2021. Spatial distribution characteristics of the microbial community and multi-phase distribution of toxic metals in the geochemical gradients caused by acid mine drainage, South China. Sci. Total Environ., 774, 145660. <https://doi.org/10.1016/j.scitotenv.2021.145660>.

- [152] Pei, H., Wang, C., Wang, Y., Yang, H., Xie, S., 2019. Distribution of microbial lipids at an acid mine drainage site in China: Insights into microbial adaptation to extremely low pH conditions. *Org. Geochem.*, 134, 77-91. <https://doi.org/10.1016/j.orggeochem.2019.05.008>.
- [153] Peng, B., Tang, X., Yu, C., Xie, S., Xiao, M., Song, Z., Tu X., 2009. Heavy metal geochemistry of the acid mine drainage discharged from the Hejiacun uranium mine in central Hunan, China. *Environ. Geol.*, 57, 421-434. <https://doi.org/10.1007/s00254-008-1313-1>.
- [154] Peng, T., Ma, L., Feng, X., Tao, J., Nan, M., Liu, Y., Li, J., Shen, L., Wu, X., Yu, R., Liu, X., Qiu, G., Zeng, W., 2017. Genomic and transcriptomic analyses reveal adaptation mechanisms of an *Acidithiobacillus ferrivorans* strain YL15 to alpine acid mine drainage. *PLoS ONE*, 12(5), e0178008. <https://doi.org/10.1371/journal.pone.0178008>.
- [155] Peng, Y., 2023. Research on the mechanism of dissolved organic matter regulating the environmental behavior of antimony elements in mining areas phreatic water. Institute of Disaster Prevention, Langfang, China (in Chinese with English abstract).
- [156] Peng, Y., Zeng, W., 2020. Diversity of microbial community in acid mine drainage from Zijinshan copper mine. *Microbiology China*, 47(9), 2887-2896 (in Chinese with English abstract). <https://doi.org/10.13344/j.microbiol.china.200279>.
- [157] Qian, J., Tong, Y., Ma, L., Zhao, W., Zhang, R., He, X., 2018. Hydrochemical characteristics and groundwater source identification of a multiple aquifer system in a coal mine. *Mine Water Environ.*, 37, 528-540. <https://doi.org/10.1007/s10230-017-0493-x>.
- [158] Qiao, D., Wang, G., Li, X., Wang, S., Zhao, Y., 2020. Pollution, sources and environmental risk assessment of heavy metals in the surface AMD water, sediments and surface soils



around unexploited Rona Cu deposit, Tibet, China. Chemosphere, 248, 125988.  
<https://doi.org/10.1016/j.chemosphere.2020.125988>.

[159] Qiao, W., Li, W., Zhang, S., Niu, Y., 2019. Effects of coal mining on the evolution of groundwater hydrogeochemistry. Hydrogeol. J., 27, 2245-2262.  
<https://doi.org/10.1007/s10040-019-01969-2>.

[160] Qin, S., Li, X., Huang, J., Li, W., Wu, P., Li, Q., Li, L., 2024. Inputs and transport of acid mine drainage-derived heavy metals in karst areas of southwestern China. Environ. Pollut., 343, 123243. <https://doi.org/10.1016/j.envpol.2023.123243>.

[161] Qin, S., Li, X., Wu, P., Li, Q., 2022. Spatial-temporal variations and multi-statistical analysis of contaminants in the waters affected by acid-mining drainage in Karst area: a case of coal-mining area in Zhijin County. Environ. Earth Sci., 81, 289.  
<https://doi.org/10.1007/s12665-022-10368-y>.

[162] Qu, D., Wang, E., Wang, L., 2023a. Analysis of roof hydrochemical characteristics of No. 2 coal seam in Dahanze coal mine. Shaanxi Coal, 3, 109-112+135 (in Chinese with English abstract).

[163] Qu, S., Liang, X., Liao, F., Mao, H., Xiao, B., Duan, L., Shi, Z., Wang, G., Yu, R., 2023b. Geochemical fingerprint and spatial pattern of mine water quality in the Shaanxi-Inner Mongolia Coal Mine Base, Northwest China. Sci. Total Environ., 854, 158812.  
<https://doi.org/10.1016/j.scitotenv.2022.158812>.

[164] Qu, S., Liao, F., Wang, G., Wang, X., Shi, Z., Liang, X., Duan, L., Liu, T., 2023c. Hydrochemical evolution of groundwater in overburden aquifers under the influence of

- mining activity: combining hydrochemistry and groundwater dynamics analysis. Environ. Earth Sci., 82, 135. <https://doi.org/10.1007/s12665-023-10817-2>.
- [165] Qu, S., Shi, Z., Liang, X., Wang, G., Han, J., 2021. Multiple factors control groundwater chemistry and quality of multi-layer groundwater system in Northwest China coalfield - Using self-organizing maps (SOM). J. Geochem. Explor., 227, 106795. <https://doi.org/10.1016/j.gexplo.2021.106795>.
- [166] Qu, S., Wang, G., Shi, Z., Zhu, Z., Wang, X., Jin, X., 2022. Impact of mining activities on groundwater level, hydrochemistry, and aquifer parameters in a coalfield's overburden aquifer. Mine Water Environ., 41, 640-653. <https://doi.org/10.1007/s10230-022-00875-6>.
- [167] Rasool, A., Xiao, T., 2019. Distribution and potential ecological risk assessment of trace elements in the stream water and sediments from Lanmuchang area, southwest Guizhou, China. Environ. Sci. Pollut. Res., 26, 3706-3722. <https://doi.org/10.1007/s11356-018-3827-8>.
- [168] Ren, H., 2021. Investigation on the mechanism and control of Karst groundwater pollution due to abandoned coal mines: A case study in the Yudong River Basin, Kaili City, Guizhou Province, China. China University of Mining & Technology, Xuzhou, China (in Chinese with English abstract).
- [169] Ren, K., Pan, X.D., Lan, G.J., Peng, C., Liang, J.P., Zeng, J., 2021a. Seasonal variation and sources identification of dissolved sulfate in a typical karst subterranean stream basin using sulfur and oxygen isotopes. Environmental Science, 42(9), 4267-4274 (in Chinese with English abstract). <https://doi.org/10.13227/j.hjlx.202101225>.

- [170] Ren, K., Zeng, J., Liang, J., Yuan, D., Jiao, Y., Peng, C., Pan, X., 2021b. Impacts of acid mine drainage on karst aquifers: Evidence from hydrogeochemistry, stable sulfur and oxygen isotopes. *Sci. Total Environ.*, 61, 143223. <https://doi.org/10.1016/j.scitotenv.2020.143223>.
- [171] Sajjad, W., Zheng, G., Ma, X., Rafiq, M., Irfan, M., Xu, W., Ali, B., 2019. Culture-dependent hunt and characterization of iron-oxidizing bacteria in Baiyin copper mine, China, and their application in metals extraction. *J. Basic Microbiol.*, 59, 323-336. <https://doi.org/10.1002/jobm.201800433>.
- [172] Sajjad, W., Zheng, G., Zhang, G., Ma, X., Xu, W., Ali, B., Rafiq, M., 2018. Diversity of prokaryotic communities indigenous to acid mine drainage and related rocks from Baiyin open-pit copper mine stope, China. *Geomicrobiol. J.*, 35(7), 580-600. <https://doi.org/10.1080/01490451.2018.1430873>.
- [173] She, Z., Pan, X., Wang, J., Shao, R., Wang, G., Wang, S., Yue, Z., 2021. Vertical environmental gradient drives prokaryotic microbial community assembly and species coexistence in a stratified acid mine drainage lake. *Water Res.*, 206, 117739. <https://doi.org/10.1016/j.watres.2021.117739>.
- [174] She, Z., Pan, X., Yue, Z., Shi, X., Gao, Y., Wang, S., Chuai, X., Wang, J., 2023a. Contrasting prokaryotic and eukaryotic community assembly and species coexistence in acid mine drainage-polluted waters. *Sci. Total Environ.*, 856, 158954. <https://doi.org/10.1016/j.scitotenv.2022.158954>.
- [175] She, Z., Wang, J., Pan, X., Ma, D., Gao, Y., Wang, S., Chuai, X., Yue, Z., 2023b. Decadal evolution of an acidic pit lake: Insights into the biogeochemical impacts of microbial

community succession. Water Res., 243, 120415.  
<https://doi.org/10.1016/j.watres.2023.120415>.

[176] Shi, L., He, L., Zhan, Z., Wang, Y., Wang, C., 2023. Formation mechanism and health risk assessment of high fluoride groundwater in sandstone of Xiaoyun coal mine, Shandong province. China Sciencepaper, 18(9), 993-999 (in Chinese with English abstract).

[177] Shi, Q., 2022a. Research on hydrogeochemical characteristics and water filling source identification of Donggou coal mine, Xinjiang. Coal Geology of China, 34(11), 41-45 (in Chinese with English abstract). <https://doi.org/10.3969/j.issn.1674-1803.2022.11.08>.

[178] Shi, X., 2022b. Hydrochemical characteristics and formation mechanism of Wuliba pyrite mine in Hanzhong City. Chang'an University, Xi'an, China (in Chinese with English abstract). <https://doi.org/10.26976/d.cnki.gchau.2022.001176>.

[179] Song, K., Wang, F., Peng, Y., Liu, J., Liu, D., 2022. Construction of a hydrogeochemical conceptual model and identification of the groundwater pollution contribution rate in a pyrite mining area. Environ. Pollut., 305, 119327.  
<https://doi.org/10.1016/j.envpol.2022.119327>.

[180] Song, L., 2019. Composition feature of microbial communities in acid mine drainage from Yangquan mining area and its impact on water quality downstream. Shanxi University, Taiyuan, China (in Chinese with English abstract).

[181] Song, W., Zhou, P.K., 2010. Characteristics and processing engineering practice of acidity mine water containing Fe and Mn. Journal of Guizhou University (Natural Sciences), 27(2), 129-132 (in Chinese with English abstract).  
<https://doi.org/10.15958/j.cnki.gdxbzrb.2010.02.013>.

- [182] Su, H., Kang, W., Xu, Y., Wang, J., 2018. Assessing groundwater quality and health risks of nitrogen pollution in the Shenfu mining area of Shaanxi Province, Northwest China. *Expo. Health*, 10, 77-97. <https://doi.org/10.1007/s12403-017-0247-9>.
- [183] Sun, H., Zhao, F., Li, W., Li, R., Ge, X., 2007. Geochemical characteristics of acid mine drainage and sediments from coal mines. *Journal of China University of Mining & Technology*, 36(2), 221-226 (in Chinese with English abstract).
- [184] Sun, H., Zhao, F., Zhang, M., Li, J., 2012. Behavior of rare earth elements in acid coal mine drainage in Shanxi Province, China. *Environ. Earth Sci.*, 67, 205-213. <https://doi.org/10.1007/s12665-011-1497-7>.
- [185] Sun, L.H., 2014. Statistical analysis of hydrochemistry of groundwater and its implications for water source identification: a case study. *Arab. J. Geosci.*, 7, 3417-3425. <https://doi.org/10.1007/s12517-013-1061-8>.
- [186] Sun, J., Takahashi, Y., Strosnider, W.H.J., Kogure, T., Wu, P., Cao, X., 2019. Tracing and quantifying contributions of end members to karst water at a coalfield in southwest China. *Chemosphere*, 234, 777-788. <https://doi.org/10.1016/j.chemosphere.2019.06.066>.
- [187] Sun, J., Tang, C., Wu, P., Liu, C., Zhang, R., 2013. Migration of Cu, Zn, Cd and As in epikarst water affected by acid mine drainage at a coalfield basin, Xingren, Southwest China. *Environ. Earth Sci.*, 69, 2623-2632. <https://doi.org/10.1007/s12665-012-2083-3>.
- [188] Sun, J., Wu, P., Han, Z., Zhang, C., Liu, H., 2009. Influence of wastewater from a high arsenic coal mine on quality of epikarst water. *Research of Environmental Sciences*, 22(12), 1440-1444 (in Chinese with English abstract). <https://doi.org/10.13198/j.res.2009.12.90.sunj.014>.

- [189] Sun, W., Xiao, E., Krumins, V., Dong, Y., Xiao, T., Ning, Z., Chen, H., Xiao, Q., 2016. Characterization of the microbial community composition and the distribution of Fe-metabolizing bacteria in a creek contaminated by acid mine drainage. *Appl. Microbiol. Biotechnol.*, 100, 8523-8535. <https://doi.org/10.1007/s00253-016-7653-y>.
- [190] Sun, W., Xiao, T., Sun, M., Dong, Y., Ning, Z., Xiao, E., Tang, S., Li, J., 2015. Diversity of the sediment microbial community in the Aha watershed (southwest China) in response to acid mine drainage pollution gradients. *Appl. Environ. Microbiol.*, 81, 4874-4884. <https://doi.org/10.1128/AEM.00935-15>.
- [191] Tan, G.-L., Shu, W.-S., Hallberg, K.B., Li, F., Lan, C.-Y., Huang, L.-N., 2007. Cultivation-dependent and cultivation-independent characterization of the microbial community in acid mine drainage associated with acidic Pb/Zn mine tailings at Lechang, Guangdong, China. *FEMS Microbiol. Ecol.*, 59(1), 118-126. <https://doi.org/10.1111/j.1574-6941.2006.00216.x>.
- [192] Tan, G.-L., Shu, W.-S., Zhou, W.-H., Li, X.-L., Lan, C.-Y., Huang, L.-N., 2009. Seasonal and spatial variations in microbial community structure and diversity in the acid stream draining across an ongoing surface mining site. *FEMS Microbiol. Ecol.*, 70, 277-285. <https://doi.org/10.1111/j.1574-6941.2009.00744.x>.
- [193] Tang, C.L., Jin, H., Liang, Y.P., 2021a. Using isotopic and hydrochemical indicators to identify sources of sulfate in karst groundwater of the Niangziguan spring field, China. *Water*, 13, 390. <https://doi.org/10.3390/w13030390>.
- [194] Tang, C.L., Liang, Y.P., Jin, H., Zhao, C.H., Shen, H.Y., Wang, Z.H., Zhao, Y., Xie, H., Liang, C., 2022. Overview of field monitoring for acid mine water system of the coal mine in

Shandi river basin. *Carsologica Sinica*, 41(4), 522-531 (in Chinese with English abstract).

<https://doi.org/10.11932/karst20220402>.

[195] Tang, C.L., Zhao, C.H., Shen, H.Y., Liang, Y.P., Wang, Z.H., 2021b. Chemical characteristics and causes of groups water in Niangziguan spring. *Environmental Science*, 42(3), 1416-1423 (in Chinese with English abstract).  
<https://doi.org/10.13227/j.hjlx.202007047>.

[196] Tang, C.L., Zheng, X.Q., Liang, Y.P., 2020. Hydrochemical characteristics and formation causes of ground Karst water systems in the Longzici spring catchment. *Environmental Science*, 41(5), 2087-2095 (in Chinese with English abstract).  
<https://doi.org/10.13227/j.hjlx.201910078>.

[197] Tang, C.Y., Wu, P., Tao, X.Z., Zhang, C.P., Han, Z.W., 2009. The basin acidification affected by AMD: A case study in Xingren county, Guizhou, China. *Carsologica Sinica*, 28(2), 135-143.

[198] Tao, X., Wu, P., Tang, C., Liu, H., Sun, J., 2012. Effect of acid mine drainage on a karst basin: a case study on the high-As coal mining area in Guizhou province, China. *Environ. Earth Sci.*, 65, 631-638. <https://doi.org/10.1007/s12665-011-1110-0>.

[199] Tong, X., Yan, L., Zhao, Y., Lin, C., Han, C., Liu, R., Liu, L., 2006. The breakdown of leaf litter in a stream impacted by acid mine drainage. *Acta Ecologica Sinica*, 26(12), 4033-4038 (in Chinese with English abstract).

[200] Wan, M.X., 2006. Microbial communities in acid mine drainage from Dabaoshan mine and succession of communities under the selective stress of ferrous iron. Central South University, Changsha, China.

- [201] Wang, B., 2023a. Study on groundwater chemical characteristics and pollutant migration in an open pit mining area. China University of Mining & Technology, Xuzhou, China (in Chinese with English abstract).
- [202] Wang, C., Liao, F., Wang, G., Qu, S., Mao, H., Bai, Y., 2023a. Hydrogeochemical evolution induced by long-term mining activities in a multi-aquifer system in the mining area. Sci. Total Environ., 854, 158806. <https://doi.org/10.1016/j.scitotenv.2022.158806>.
- [203] Wang, J., Wu Y.-G., Liu, F., Yu, Y., Zeng, L., Wang, L., Qin, Z., 2011. Water quality analysis and acute toxicity to *daphnia carinata* of various water samples from typical coal mining areas in Guizhou province. Environmental Science & Technology, 34(4), 68-73 (in Chinese with English abstract).
- [204] Wang, M., Wang, X., Zhou, S., Chen, Z., Chen, M., Feng, S., Li, J., Shu, W., Cao, B., 2023b. Strong succession in prokaryotic association networks and community assembly mechanisms in an acid mine drainage-impacted riverine ecosystem. Water Res., 243, 120343. <https://doi.org/10.1016/j.watres.2023.120343>.
- [205] Wang, Q., Dong, S., Wang, H., Yang, J., Huang, H., Dong, X., Yu, B., 2020. Hydrogeochemical processes and groundwater quality assessment for different aquifers in the Caojiatan coal mine of Ordos Basin, northwestern China. Environ. Earth Sci., 79, 199. <https://doi.org/10.1007/s12665-020-08942-3>.
- [206] Wang, S., Tang, H., Shi, L., Liu, J., Yang, Z., Zhu, H., Xu, F., Zhu, K., Fan, J., Fang, G., 2022a. Hydrogeochemical analysis and assessment of mine water quality in Tangjiahui mining area, Inner Mongolia, China. Environ. Earth Sci., 81, 49. <https://doi.org/10.1007/s12665-022-10205-2>.



- [207] Wang, T., Jin, D., Yang, J., Liu, J., Wang, Q., 2019. Assessing mine water quality using a hierarchy fuzzy variable sets method: a case study in the Guojiawan mining area, Shaanxi Province, China. *Environ. Earth Sci.*, 78, 264. <https://doi.org/10.1007/s12665-019-8216-1>.
- [208] Wang, W., Qiang, Y., Wang, Y., Sun, Q., Zhang, M., 2016. Impacts of Yuyang coal mine on groundwater quality in Hongshixia water source, Northwest China: A physicochemical and modeling research. *Expo. Health*, 8, 431-442. <https://doi.org/10.1007/s12403-016-0223-9>.
- [209] Wang, Y., 2023b. Hydrochemical characteristics and evolution rules of mine water in Shendong mining area, China. Graduate School of China Coal Research Institute, Beijing (in Chinese with English abstract).
- [210] Wang, Y., Dong, R., Zhou, Y., Luo, X., 2019. Characteristics of groundwater discharge to river and related heavy metal transportation in a mountain mining area of Dabaoshan, Southern China. *Sci. Total Environ.*, 679, 346-358. <https://doi.org/10.1016/j.scitotenv.2019.04.273>.
- [211] Wang, Y., Hao, Y., Gao, Z., Ma, Y., Liu, J., 2022b. Characteristics and the origins of the main chemical components in mine water in the Xishan mining area, North China. *Environ. Earth Sci.*, 81, 240. <https://doi.org/10.1007/s12665-022-10363-3>.
- [212] Wang, Y., Ma, T., Luo, Z., 2001. Geostatistical and geochemical analysis of surface water leakage into groundwater on a regional scale: a case study in the Liulin karst system, northwestern China. *J. Hydrol.*, 246, 223-234. [https://doi.org/10.1016/S0022-1694\(01\)00376-6](https://doi.org/10.1016/S0022-1694(01)00376-6).

- [213] Wang, Y., Li, S., Ma, C., Wan, K., Liu, S., Yu, B., 2022c. Isotope analysis of source and migration of sulfate in water environment of Tongshankou mining area. *Resources Environment & Engineering*, 36(3), 265-273 (in Chinese with English abstract).
- [214] Wang, Y., Zhou, J., Zou, Y., Zhang, C., Liu, J., 2022d. An analysis of the hydrochemical characteristics and influencing factors of different water bodies in the Liangjia coal mine area, North China. *Arab. J. Geosci.*, 15, 1216. <https://doi.org/10.1007/s12517-022-10513-8>.
- [215] Wang, Z., Wang, H., Deng, S., 2023c. Research on hydrochemical evolution mechanism of groundwater in mining area based on reverse hydrogeochemical simulation. *Mine Construction Technology*, 44(6), 58-62 (in Chinese with English abstract). <https://doi.org/10.19458/j.cnki.cn11-2456/td.2023.06.010>.
- [216] Wen, B., Zhou, A., Zhou, J., Huang, J., Long, T., Jia, X., Zhou, W., Li, W., 2023a. Sources of antimony contamination and its migration into water systems of Xikuangshan, China: Evidence from hydrogeochemical and stable isotope (H, O, S, and Sr) signatures. *Environ. Pollut.*, 337, 122381. <https://doi.org/10.1016/j.envpol.2023.122381>.
- [217] Wen, B., Zhou, J., Jia, X., Zhou, W., Huang, Y., 2022. Attenuation of antimony in groundwater from the Xikuangshan antimony mine, China: Evidence from sulfur and molybdenum isotope study. *Appl. Geochem.*, 146, 105429. <https://doi.org/10.1016/j.apgeochem.2022.105429>.
- [218] Wen, B., Zhou, J., Zhou, A., Liu, C., Xie, L., 2016. Sources, migration and transformation of antimony contamination in the water environment of Xikuangshan, China: Evidence from geochemical and stable isotope (S, Sr) signatures. *Sci. Total Environ.*, 569-570, 114-122. <https://doi.org/10.1016/j.scitotenv.2016.05.124>.

- [219] Wen, B., Zhou, J., Tang, P., Jia, X., Zhou, W., Huang, J., 2023b. Antimony (Sb) isotopic signature in water systems from the world's largest Sb mine, central China: Novel insights to trace Sb source and mobilization. *J. Hazard. Mater.*, 446, 130622. <https://doi.org/10.1016/j.jhazmat.2022.130622>.
- [220] Wen, J., Tang, C., Cao, Y., Li, X., Chen, Q., 2018. Hydrochemical evolution of groundwater in a riparian zone affected by acid mine drainage (AMD), South China: the role of river-groundwater interactions and groundwater residence time. *Environ. Earth Sci.*, 77, 794. <https://doi.org/10.1007/s12665-018-7977-2>.
- [221] Wen, J., Tang, C., Cao, Y., Li, X., 2020. Understanding the inorganic carbon transport and carbon dioxide evasion in groundwater with multiple sulfate sources during different seasons using isotope records. *Sci. Total Environ.*, 710, 134480. <https://doi.org/10.1016/j.scitotenv.2019.134480>.
- [222] Wu, A., Zhang, Y., Zhao, X., Shi, H., Xu, S., Li, J., Zhang, G., Guo, L., 2022. Experimental research on the remediation ability of four wetland plants on acid mine drainage. *Sustainability*, 14, 3655. <https://doi.org/10.3390/su14063655>.
- [223] Wu, D., Wu, J., Wei, C., Gao, X., Li, B., Lu, J., 2024. Identification and prediction of mixed water sources in adjacent limestone aquifers based on conventional hydrochemistry and strontium isotopes. *J. Earth Syst. Sci.*, 133, 44. <https://doi.org/10.1007/s12040-023-02248-1>.
- [224] Wu, J., Ge, Y., Li, J., Lai, X., Chen, R., 2023. A PMF-SSD based approach for the source apportionment and source-specific ecological risk assessment of Le'an river in Jiangxi Province, China. *Environ. Res.*, 219, 115027. <https://doi.org/10.1016/j.envres.2022.115027>.

- 889 [225] Wu, P., Tang, C., Liu, C., Zhu, L., Pei, T., Feng, L., 2009. Geochemical distribution and  
 890 removal of As, Fe, Mn and Al in a surface water system affected by acid mine drainage at a  
 891 coalfield in Southwestern China. *Environ. Geol.*, 57, 1457-1467.  
 892 <https://doi.org/10.1007/s00254-008-1423-9>.
- 893 [226] Wu, Y.Q., Zhan, Y.H., 2005. AMD control from source and water-sewage separation project  
 894 in Yangtaowu, Zhujia waste-rock yards and open-pit of Dexing Copper Mine. *Nonferrous*  
 895 *Metals*, 57(4), 101-105+109 (in Chinese with English abstract).
- 896 [227] Xiao, H.Y., Zhou, W.B., Zeng, F.P., Wu, D.S., 2010. Water chemistry and heavy metal  
 897 distribution in an AMD highly contaminated river. *Environ. Earth Sci.*, 59, 1023-1031.  
 898 <https://doi.org/10.1007/s12665-009-0094-5>.
- 899 [228] Xiao, S., Xie, X., Liu, J., 2009. Microbial communities in acid water environments of two  
 900 mines, China. *Environ. Pollut.*, 157, 1045-1050.  
 901 <https://doi.org/10.1016/j.envpol.2008.09.035>.
- 902 [229] Xiao, T., Boyle, D., Guha, J., Rouleau, A., Hong, Y., Zheng, B., 2003. Groundwater-related  
 903 thallium transfer processes and their impacts on the ecosystem: southwest Guizhou Province,  
 904 China. *Appl. Geochem.*, 18(5), 675-691. [https://doi.org/10.1016/S0883-2927\(02\)00154-3](https://doi.org/10.1016/S0883-2927(02)00154-3).
- 905 [230] Xie, G., Zhang, W., Hao, C., 2022. Distribution characteristics, source and formation  
 906 mechanisms of fluoride in the drinking groundwater in Shendong mining area. *Science*  
 907 *Technology and Engineering*, 22(19), 8554-8561 (in Chinese with English abstract).
- 908 [231] Xie, J.P., He, Z.L., Liu, X.X., Liu, X.D., Van Nostrand, J.D., Deng, Y., Wu, L.Y., Zhou, J.Z.,  
 909 Qiu, G.Z., 2011a. GeoChip-based analysis of the functional gene diversity and metabolic

potential of microbial communities in acid mine drainage. Appl. Environ. Microbiol., 77(3), 991-999. <https://doi.org/10.1128/AEM.01798-10>.

[232] Xie, J.-P., Jiang, H.-C., Liu, X.-X., Liu, X.-D., Zhou, J.-Z., Qiu, G.-Z., 2011b. 16s rDNA based microbial diversity analysis of eleven acid mine drainages obtained from three Chinese copper mines. J. Cent. South Univ. Technol., 18, 1930-1939. <https://doi.org/10.1007/s11771-011-0925-x>.

[233] Xin, R., Banda, J.F., Hao, C., Dong, H., Pei, L., Guo, D., Wei, P., Du, Z., Zhang, Y., Dong, H., 2021. Contrasting seasonal variations of geochemistry and microbial community in two adjacent acid mine drainage lakes in Anhui Province, China. Environ. Pollut., 268, 115826. <https://doi.org/10.1016/j.envpol.2020.115826>.

[234] Xu, J., Gui, H., Chen, J., Li, C., Li, Y., Zhao, C., Guo, Y., 2022. Hydrogeochemical Characteristics and Formation Mechanisms of the Geothermal Water in the Qingdong Coal Mine, Northern Anhui Province, China. Mine Water Environ., 41, 1015-1026. <https://doi.org/10.1007/s10230-022-00895-2>.

[235] Xu, K., Dai, G., Duan, Z., Xue, X., 2018. Hydrogeochemical evolution of an ordovician limestone aquifer influenced by coal mining: A case study in the Hancheng mining area, China. Mine Water Environ., 37, 238-248. <https://doi.org/10.1007/s10230-018-0519-z>.

[236] Xu, K., Qiao, W., Li, W., Feng, L., Liu, M., Cheng, X., 2023. Hydrochemistry characteristics and connection of aquifers in deep karst mine. Safety in Coal Mines, 54(8), 150-160 (in Chinese with English abstract). <https://doi.org/10.13347/j.cnki.mkaq.2023.08.021>.

- [237] Xu, W.X., Li, H., Liu, J., Li, X.L., 2015. A preliminary study of mine water quality of several Pb-Zn deposits. *Mineral Resources and Geology*, 29(1), 102-105 (in Chinese with English abstract).
- [238] Xue, J., Ma, L., Qian, J., Zhao, W., 2024. Hydrogeochemical characteristics and evolution mechanism of groundwater in the Guqiao Coal Mine, Huainan Coalfield, China. *Environ. Earth Sci.*, 83, 35. <https://doi.org/10.1007/s12665-023-11333-z>.
- [239] Yang, F., Yang, Z., Zhou, H., Sun, L., Zhang, A., Li, Y., Qu, L., Tang, L., 2023a. Isotope provenance of AMD and treatment options for large, abandoned mines: A case study of the abandoned Dashu pyrite mine, Southwest China. *Geochem.*, 83, 125976. <https://doi.org/10.1016/j.chemer.2023.125976>.
- [240] Yang, Q., Cao, Y., Zhang, Y., Chen, J., Wang, S., Tian, D., 2023b. Hydrochemical characteristics and its cause analysis of groundwater and mine water in closed lead zinc mining area. *Eco. Environ. Sci.*, 32(2), 361-371 (in Chinese with English abstract). <https://doi.org/10.16258/j.cnki.1674-5906.2023.02.016>.
- [241] Yang, W.-J., Ding, K.-B., Zhang, P., Qiu, H., Cloquet, C., Wen, H.-J., Morel, J.-L., Qiu, R.-L., Tang, Y.-T., 2019. Cadmium stable isotope variation in a mountain area impacted by acid mine drainage. *Sci. Total Environ.*, 646, 696-703. <https://doi.org/10.1016/j.scitotenv.2018.07.210>.
- [242] Yang, Y., 2021. Environmental impacts and causes of pit water in typical closed coal mine in Hunan, China. *Mining Technol.*, 21, 72-75 (in Chinese). <https://doi.org/10.13828/j.cnki.ckjs.2021.s1.019>.

- 951 [243] Yang, Y., Li, Y., Sun, Q., 2014. Archaeal and bacterial communities in acid mine drainage  
952 from metal-rich abandoned tailing ponds, Tongling, China. *Trans. Nonferrous Met. Soc.*  
953 *China*, 24, 3332-3342. [https://doi.org/10.1016/S1003-6326\(14\)63474-9](https://doi.org/10.1016/S1003-6326(14)63474-9).
- 954 [244] Yang, Y., Mei, A., Gao, S., Zhao, D., 2023c. Both natural and anthropogenic factors control  
955 surface water and groundwater chemistry and quality in the Ningtiaota coalfield of Ordos  
956 Basin, Northwestern China. *Environ. Sci. Pollut. Res.*, 30, 67227-67249.  
957 <https://doi.org/10.1007/s11356-023-27147-2>.
- 958 [245] Yang, Y., Shi, W., Wan, M., Zhang, Y., Zou, L., Huang, J., Qiu, G., Liu, X., 2008. Diversity  
959 of bacterial communities in acid mine drainage from the Shen-bu copper mine, Gansu  
960 province, China. *Electron. J. Biotechnol.* 11(1), 6. [https://doi.org/10.2225/vol11-issue1-](https://doi.org/10.2225/vol11-issue1-fulltext-6)  
961 [fulltext-6](https://doi.org/10.2225/vol11-issue1-fulltext-6).
- 962 [246] Yang, Y., Wan, M.X., Shi, W.Y., Peng, H., Qiu, G.Z., Zhou, J.Z., Liu, X.D., 2007. Bacterial  
963 diversity and community structure in acid mine drainage from Dabaoshan Mine, China.  
964 *Aquat. Microb. Ecol.*, 47, 141-151.
- 965 [247] Yang, Y., Xu, A., Zhang, Y., Qian, L., Liu, X., Qiu, G., 2007. Isolation and characterization  
966 of a facultative autotrophic bacterial strain and its cellular polymer granules from acid mine  
967 drainage. *J. Wuhan Univ. (Nat. Sci. Ed.)*, 53(6), 753-758 (in Chinese with English abstract).  
968 <https://doi.org/10.14188/j.1671-8836.2007.06.014>.
- 969 [248] Yang, Z., Hu, X., Liu, S., 2023d. Brief analysis of hydro-chemical characteristics of  
970 groundwater in Zhongguan iron mine. *Ground water*, 45(5), 26-29 (in Chinese with English  
971 abstract). <https://doi.org/10.19807/j.cnki.DXS.2023-05-007>.

- 972 [249] Yang, Z., Yang, F., Pang, L., Mao, Z., Wu, Y., 2021. Chemical characteristics and cause  
973 analysis of mine water gushing during dry season of abandoned coal mines in Gaotaiyuan  
974 area, North Sichuan. *Sichuan Environ.*, 40(1), 13-16 (in Chinese with English abstract).  
975 <https://doi.org/10.14034/j.cnki.schj.2021.01.003>.
- 976 [250] Yi, C., Chen, B., Li, W., Zhou, Y., Wang, Z., Zhang, J., Cheng, Y., Zou, Z., 2016.  
977 Geochemical characteristics of rare earth elements in Dabaoshan acid mine drainages,  
978 Guangdong Province, China. *Earth and Environment*, 44(1), 73-81 (in Chinese with English  
979 abstract). <https://doi.org/10.14050/j.cnki.1672-9250.2016.01.010>.
- 980 [251] Yin, H., Cao, L., Qiu, G., Wang, D., Kellogg, L., Zhou, J., Liu, X., Dai, Z., Ding, J., Liu, X.,  
981 2008a. Molecular diversity of 16S rRNA and *gyrB* genes in copper mines. *Arch. Microbiol.*  
982 189, 101-110. <https://doi.org/10.1007/s00203-007-0298-6>.
- 983 [252] Yin, H., Cao, L., Xie, M., Chen, Q., Qiu, G., Zhou, J., Wu, L., Wang, D., Liu, X., 2008b.  
984 Bacterial diversity based on 16S rRNA and *gyrB* genes at Yinshan mine, China. *Syst. Appl.*  
985 *Microbiol.*, 31, 302-311. <https://doi.org/10.1016/j.syapm.2008.05.003>.
- 986 [253] Yin, H., Wu, Y., Jiang, L., Chen, M., Pei, N., Luo, Y., Lyu, L., 2022. Hydrogeochemical  
987 vertical zonation and evolution model of the Kongjiagou coalmine in Sichuan, China. *Water*  
988 *Supply*, 22(6), 6111. <https://doi.org/10.2166/ws.2022.205>.
- 989 [254] Yuan, R., Li, Z., Guo, S., 2023. Health risks of shallow groundwater in the five basins of  
990 Shanxi, China: Geographical, geological and human activity roles. *Environ. Pollut.*, 316,  
991 120524. <https://doi.org/10.1016/j.envpol.2022.120524>.



- 992 [255] Yue, M., Zhao, F., Ren, D., 2004. The environment geochemistry information of the coal  
993 mine acid mining drainage. *Coal Geology & Exploration*, 32(3), 46-49 (in Chinese with  
994 English abstract).
- 995 [256] Zhang, C.P., Wu, P., Tang, C.Y., Xie, H.H., Zeng, Z.C., Yang, S.Z., 2014a. Geochemical  
996 behavior of arsenic in reducing sulfidic sediments of reservoir contaminated by acid mine  
997 drainage. *Environ. Earth Sci.*, 71, 4341-4351. <https://doi.org/10.1007/s12665-013-2828-7>.
- 998 [257] Zhang, H., Xu, G., Zhan, H., Chen, X., Liu, M., Wang, M., 2020. Identification of  
999 hydrogeochemical processes and transport paths of a multi-aquifer system in closed mining  
1000 regions. *J. Hydrol.*, 589, 125344. <https://doi.org/10.1016/j.jhydrol.2020.125344>.
- 1001 [258] Zhang, H., Yu, J., Zhou, S., 2014b. Spatial distribution of As, Cr, Pb, Cd, Cu, and Zn in the  
1002 water and sediment of a river impacted by gold mining. *Mine Water Environ.*, 33, 206-216.  
1003 <https://doi.org/10.1007/s10230-013-0254-4>.
- 1004 [259] Zhang, J., Chen, L., Hou, X., Lin, M., Ren, X., Li, J., Zhang, M., Zheng, X., 2021a. Multi-  
1005 isotopes and hydrochemistry combined to reveal the major factors affecting Carboniferous  
1006 groundwater evolution in the Huaibei coalfield, North China. *Sci. Total Environ.*, 791,  
1007 148420. <https://doi.org/10.1016/j.scitotenv.2021.148420>.
- 1008 [260] Zhang, J., Chen, L., Li, J., Chen, Y., Ren, X., Shi, X., 2021b. Analysis of mining effects on  
1009 the geochemical evolution of groundwater, Huaibei coalfield, China. *Environ. Earth Sci.*,  
1010 80, 98. <https://doi.org/10.1007/s12665-021-09399-8>.
- 1011 [261] Zhang, K., 2023a. The characteristics and utilization of residual resources in closed coal  
1012 mines in Yangquan Mining Area. China University of Mining & Technology, Xuzhou, China  
1013 (in Chinese with English abstract).

- 1014 [262] Zhang, L., 2008. Influence and Evaluation of Coal Mining on Surface Water Environmental  
1015 Quality in Karst Areas. Master's Thesis, Guizhou University, Guiyang, China (in Chinese  
1016 with English abstract).
- 1017 [263] Zhang, L., Hao, C., Wang, L., Li, S., Feng, C., 2012. Characteristics of the eukaryotic  
1018 community structure in acid mine drainage lake in Anhui Province, China. *Acta*  
1019 *Microbiologica Sinica*, 52(7), 875-884 (in Chinese with English abstract).  
1020 <https://doi.org/10.13343/j.cnki.wsxb.2012.07.005>.
- 1021 [264] Zhang, M., Chen, L., Yao, D., Hou, X., Zhang, J., Qin, H., Ren, X., Zheng, X., 2022.  
1022 Hydrogeochemical processes and inverse modeling for a multilayer aquifer system in the  
1023 Yuaner coal mine, Huaibei coalfield, China. *Mine Water Environ.*, 41, 775-789.  
1024 <https://doi.org/10.1007/s10230-022-00851-0>.
- 1025 [265] Zhang, Q., 2021. Composition and function of microbial community in different acid mine  
1026 wastewater. China University of Geosciences, Beijing, China (in Chinese with English  
1027 abstract).
- 1028 [266] Zhang, Q., Banda, J.F., Dong, H., Hao, C., Guo, D., Mao, W., Ma, L., Dong, H., 2021c.  
1029 Responses of acidophilic communities in different acid mine drainages to environmental  
1030 conditions in Nanshan mine, Anhui province, China. *Geomicrobiol. J.*, 38(8), 686-697.  
1031 <https://doi.org/10.1080/01490451.2021.1937405>.
- 1032 [267] Zhang, R.X., Zhai, Q.D., Ye, H.J., Wu, P., Rong, R., 2021d. Pollution characteristics and  
1033 health risk assessment of heavy metals from coal mine drainage of different regions in  
1034 Guizhou Province. *J. Safe. Environ.*, 21(3), 1333-1341 (in Chinese with English abstract).  
1035 <https://doi.org/10.13637/j.issn.1009-6094.2020.0320>.

- 1036 [268] Zhang, T., Tu, Z., Lu, G., Duan, X., Yi, X., Guo, C., Dang, Z., 2017. Removal of heavy  
1037 metals from acid mine drainage using chicken eggshells in column mode. J. Environ.  
1038 Manag., 188, 1-8. <https://doi.org/10.1016/j.jenvman.2016.11.076>.
- 1039 [269] Zhang, X., Li, X., Gao, X., 2016. Hydrochemistry and coal mining activity induced karst  
1040 water quality degradation in the Niangziguan karst water system, China. Environ. Sci. Pollut.  
1041 Res., 23, 6286-6299. <https://doi.org/10.1007/s11356-015-5838-z>.
- 1042 [270] Zhang, X., Tang, S., Wang, M., Sun, W., Xie, Y., Peng, H., Zhong, A., Liu, H., Zhang, X.,  
1043 Yu, H., Giesy, J.P., Hecker, M., 2019. Acid mine drainage affects the diversity and metal  
1044 resistance gene profile of sediment bacterial community along a river. Chemosphere, 217,  
1045 790-799. <https://doi.org/10.1016/j.chemosphere.2018.10.210>.
- 1046 [271] Zhang, Y., 2023. Assessment of water environment quality and prediction of environmental  
1047 capacity in Kubai and Hami mining areas. China University of Mining & Technology,  
1048 Xuzhou, China (in Chinese with English abstract).
- 1049 [272] Zhang, Y., Yang, Y., Liu, J., Qiu, G., 2013. Isolation and characterization of  
1050 *Acidithiobacillus ferrooxidans* strain QXS-1 capable of unusual ferrous iron and sulfur  
1051 utilization. Hydrometallurgy, 136, 51-57. <https://doi.org/10.1016/j.hydromet.2013.03.005>.
- 1052 [273] Zhang, Z.Y., Lu, Z.B., Xu, S.G., Kui, J.T., Wu, X., Zheng, F.K., 2021e. The chemical  
1053 characteristics of mine water and the ways to pollute groundwater in Yudonghe mining area  
1054 in Kaili City. J. Geol. Hazards Environ. Preservation, 32(2), 86-92 (in Chinese with English  
1055 abstract).

- 1056 [274] Zhao, F., Cong, Z., Sun, H., Ren, D., 2007. The geochemistry of rare earth elements (REE)  
 1057 in acid mine drainage from the Sitai coal mine, Shanxi Province, North China. International  
 1058 Journal of Coal Geology, 70, 184-192. <https://doi.org/10.1016/j.coal.2006.01.009>.
- 1059 [275] Zhao, H., Xia, B., Qin, J., Zhang, J., 2012. Hydrogeochemical and mineralogical  
 1060 characteristics related to heavy metal attenuation in a stream polluted by acid mine drainage:  
 1061 A case study in Dabaoshan Mine, China. J. Environ. Sci., 24(6), 979-989.  
 1062 [https://doi.org/10.1016/S1001-0742\(11\)60868-1](https://doi.org/10.1016/S1001-0742(11)60868-1).
- 1063 [276] Zhao, Q., Yang, Z., Yang Z., 2016. Analysis of water quality problems and integrated  
 1064 treatment of coal mine water in Yunnan. Environment and Sustainable Development, 1, 124-  
 1065 127 (in Chinese with English abstract). [https://doi.org/10.19758/j.cnki.issn1673-](https://doi.org/10.19758/j.cnki.issn1673-288x.2016.01.036)  
 1066 [288x.2016.01.036](https://doi.org/10.19758/j.cnki.issn1673-288x.2016.01.036).
- 1067 [277] Zhao, X., Peng, W.H., Chen, K., Qiu, X.Y., Sun, L.H., 2022. Potential hydraulic connectivity  
 1068 of coal mine aquifers based on statistical analysis of hydrogeochemistry. Water Sci. Eng.,  
 1069 15(4), 285-293. <https://doi.org/10.1016/j.wse.2022.08.004>.
- 1070 [278] Zhong, M., 2023. Study on the interaction between dissolved organic matter and heavy  
 1071 metals under water-rock interaction in coal mine. China University of Mining & Technology,  
 1072 Xuzhou, China (in Chinese with English abstract).
- 1073 [279] Zhong, X., Wu, Q., Tang, B., Wang, Y., Chen, J., Zeng, Y., 2024. Hydrogeochemical  
 1074 mechanisms and hydraulic connection of groundwaters in the Dongming Opencast Coal  
 1075 Mine, Hailar, Inner Mongolia. Mine Water Environ., 43, 28-40.  
 1076 <https://doi.org/10.1007/s10230-023-00963-1>.

- 1077 [280] Zhou, J., Nyirenda, M.T., Xie, L., Li, Y., Zhou, B., Zhu, Y., Liu, H., 2017. Mine waste acidic  
1078 potential and distribution of antimony and arsenic in waters of the Xikuangshan mine, China.  
1079 Appl. Geochem., 77, 52-61. <https://doi.org/10.1016/j.apgeochem.2016.04.010>.
- 1080 [281] Zhou, J., Zhang, Q., Kang, F., Zhang, Y., Yuan, L., Wei, D., Lin, S., 2018. Using multi-  
1081 isotopes ( $^{34}\text{S}$ ,  $^{18}\text{O}$ ,  $^2\text{H}$ ) to track local contamination of the groundwater from Hongshan-  
1082 Zhaili abandoned coal mine, Zibo city, Shandong province. Int. Biodeter. Biodegr., 128, 48-  
1083 55. <https://doi.org/10.1016/j.ibiod.2016.08.023>.
- 1084 [282] Zhou, Y., 2023. Study on hydrogeological characteristics of deep copper deposits in  
1085 Zijinshan gold and copper mine. Hydrogeology, 14, 122-125 (in Chinese with English  
1086 abstract).
- 1087 [283] Zhou, Y-F., Xie, Y., Zhou, L-X., 2010. Formation and environmental implications of Iron-  
1088 enriched precipitates derived from natural neutralization of acid mine drainage.  
1089 Environmental Science, 31(6), 1581-1588 (in Chinese with English abstract).  
1090 <https://doi.org/10.13227/j.hjlx.2010.06.004>.
- 1091 [284] Zhu, G., Wu, X., Ge, J., Liu, F., Zhao, W., Wu, C., 2020a. Influence of mining activities on  
1092 groundwater hydrochemistry and heavy metal migration using a self-organizing map (SOM).  
1093 J. Clean. Prod., 257, 120664. <https://doi.org/10.1016/j.jclepro.2020.120664>.
- 1094 [285] Zhu, J., Wu, F.C., Deng, Q.J., Shao, S.X., 2009. Environmental characteristics of water near  
1095 the Xikuangshan antimony mine, Hunan Province. Acta Sci. Circumst., 29, 655-661 (in  
1096 Chinese with English abstract). <https://doi.org/10.13671/j.hjkxxb.2009.03.002>.

- 1097 [286] Zhu, J., Zhang, P., Yuan, S., Tong, M., 2020b. Arsenic oxidation and immobilization in acid  
1098 mine drainage in karst areas. *Sci. Total Environ.*, 727, 138629.  
1099 <https://doi.org/10.1016/j.scitotenv.2020.138629>.
- 1100 [287] Zhu, L., 2023. Microbial driving mechanism and application of the mine water quality  
1101 formation in Menkeqing coal mine. China University of Mining & Technology, Xuzhou,  
1102 China (in Chinese with English abstract).
- 1103 [288] Zhu, M., Li, B., Liu, G., 2022. Groundwater risk assessment of abandoned mines based on  
1104 pressure-state-response-The example of an abandoned mine in southwest China. *Energy*  
1105 *Reports*, 8, 10728-10740. <https://doi.org/10.1016/j.egy.2022.08.171>.
- 1106 [289] Zhu, M., Li, B., Liu, G., 2023. Water quality analysis and groundwater health risk assessment  
1107 of acid mine inflow from abandoned coal mines around Guangyuan City. *J. Environ. Eng.*  
1108 *Technol.*, 13(3), 1097-1107 (in Chinese with English abstract).  
1109 <https://doi.org/10.12153/j.issn.1674-991X.20220622>.
- 1110 [290] Zhu, S., 2022. Research on water chemical characteristics in the middle of Panxie mining  
1111 area and development of database system. Anhui University of Science and Technology,  
1112 Huainan, China (in Chinese with English abstract).
- 1113 [291] Zong, W., Zhao, B., 2023. Groundwater chemical characteristics and forming reasons of  
1114 Yuanyanghu mining area. *Safety in Coal Mines*, 54(8), 161-167 (in Chinese with English  
1115 abstract). <https://doi.org/10.13347/j.cnki.mkaq.2023.08.022>.
- 1116 [292] Zou, H.-Y., He, L.-Y., Gao, F.-Z., Zhang, M., Chen, S., Wu, D.-L., Liu, Y.-S., He, L.-X., Bai,  
1117 H., Ying, G.-G., 2021. Antibiotic resistance genes in surface water and groundwater from

1118 mining affected environments. Sci. Total Environ., 772, 145516.  
1119 <https://doi.org/10.1016/j.scitotenv.2021.145516>.  
1120 [293] Zou, L.-H., Qian, L., Zhang, Y.-F., Wan, M.-X., Qiu, G.-Z., Yang, Y., 2008. Isolation and  
1121 identification of *Acidiphilium* strain DY from complex sulfide mines and its bioleaching  
1122 characterization. The Chinese Journal of Nonferrous Metals, 18(2), 336-341 (in Chinese  
1123 with English abstract). <https://doi.org/10.19476/j.ysxb.1004.0609.2008.02.025>.
