# Supplementary material for: Mapping mining-affected water pollution in China: Status, patterns, risks, and implications
Source: Copernicus journal article supplement (doi:10.5194/hess-2024-387), 2024-12-16
Supplement: Supplementary file [file hess-2024-387-AC2-supplement.pdf]

Response to the comments on the manuscript (HESS-2024-387) “**Mapping mining-affected water pollution in China: Status, patterns, risks, and implications**” by Ziyue Yin, Jian Song, Dianguang Liu, Jianfeng Wu\*, Yun Yang, Yuanyuan Sun, and Jichun Wu.

Note that the following text in Arial Narrow font denotes Referee’s comments and in Times New Roman font denotes our response to the comments in the review. In our resubmission, the marked PDF file ([HESS-2024-387\\_R1\\_marked.pdf](#) and [Supplement\\_R1\\_marked.pdf](#)) has clearly indicated all changes to the original manuscript, tables and figures. Also, in our marked PDF file, marked in ~~a green strikethrough font~~ is the text that should be removed from the original manuscript and marked in a red font is the text that has been added to the current revision. In addition, Line number(s) mentioned below can be referred to as that line numbering in the marked revised manuscript.

## **Response to Referee #2’s Comments**

The manuscript aims to provide a comprehensive assessment of mining-affected water pollution across China by compiling a large dataset (8433 water samples from 298 mines). The study evaluates spatial patterns, assesses both carcinogenic and non-carcinogenic risks to human health, and discusses management implications for both coal and metal mining areas. While the work is well supported by extensive data and robust methodologies, questions remain regarding the novelty of the contribution, as the manuscript does not clearly delineate how its findings significantly extend beyond previous studies.

**[Response]** We sincerely thank you for your constructive and conscientious suggestions. Hereby we have fully incorporated and addressed all the comments in the revised manuscript and given a point-by-point response as below. In particular, a more explicit statement of our novel contributions relative to the existing literature (*e.g.*, [Cheng, 2003](#); [He et al., 2013](#); [Hu et al., 2013](#); [Feng et al., 2014](#); [Sun et al., 2025](#)) has been added to the **Conclusion (Lines 743-771)** to address your concern that "the manuscript does not clearly delineate how its findings significantly extend beyond previous studies".

It is noteworthy that previous studies predominantly concentrated on localized water pollution from individual coal or metal mines, while national-scale assessments have primarily addressed impacts exclusively attributed to coal mining activities. The new and unique contributions of the

current study are: (i) establishing a national-scale high-quality database covering 8,433 surface water or groundwater samples (6,175 coal mine water samples and 2,258 metal mine water samples) from 298 mines (211 coal mines and 87 metal mines) in 26 provinces/autonomous regions of China; and (ii) filling the gap of the nationwide spatial patterns of water pollution and associated health risks from both coal and metal mining activities for the first attempt. Specifically, eight heavy metals (i.e., Cr, Ni, Cu, Zn, As, Cd, Hg, and Pb) are considered in the current study based on a national-scale high-quality hydrochemical database. The new results show that Zn, Ni, and Cu are the predominant contaminations of both coal and metal mines in China. The detectable concentrations of several heavy metals are higher in most metal mines than in coal mines, especially in mining-affected water with low pH (< 6.5). The order of detectable median values of water affected by coal mining is Zn (0.4211) > Ni (0.1796) > Cu (0.0431) > Cr (0.0080) > Cd (0.0036) > As (0.0034) > Pb (0.0023) > Hg (0.0004), while that of water affected by metal mining is Zn (7.200) > Cu (1.7325) > Ni (0.2142) > Pb (0.1498) > Cr (0.0500) > Cd (0.0383) > As (0.0281) > Hg (0.0090). In terms of spatial patterns, the pollution hotspots and potential risks of mining-affected water (with low pH, high sulfate, Fe, Mn, and heavy metals) are pronounced in the southern regions, especially in Guizhou, Guangdong, Fujian, Jiangxi, Hunan, and Guangxi provinces/autonomous regions. These phenomena are closely linked to the underlying mechanisms, such as climatic conditions, geological factors, and mining practices. Accordingly, the findings of the study yield critical insights for designing differentiated management measures and formulating spatially-adaptive pollution control strategies across three key dimensions, including geographic scales (site-specific scale, provincial scale, or national scale), mine types (coal or metal), and mining status (active or abandoned). This multidimensional framework enables policymakers to strategically balance the trade-off between green mining activities and human health priorities.

Cheng, S.: Heavy metal pollution in China: origin, pattern and control. *Environ. Sci. Pollut. Res.*, 10(3), 192-198. <https://doi.org/10.1065/espr2002.11.141.1>, 2003.

Feng, Q., Li, T., Qian, B., Zhou, L., Gao, B., and Yuan, T.: Chemical Characteristics and Utilization of Coal Mine Drainage in China. *Mine Water Environ.*, 33, 276-286, <https://doi.org/10.1007/s10230-014-0271-y>, 2014.

He, B., Yun, Z.J., Shi, J.B., and Jiang, G.B.: Research progress of heavy metal pollution in China: Sources, analytical methods, status, and toxicity. *Chin. Sci. Bull.*, 58(2), 134-140, <https://doi.org/10.1007/s11434-012-5541-0>, 2013.

Hu, H., Jin, Q., and Kavan, P.: A study of heavy metal pollution in China: Current status, pollution-control policies and countermeasures. *Sustainability*, 6, 5820-5838, <https://doi.org/10.3390/su6095820>, 2014.

Sun, Y.J., Guo, J., Xu, Z.M., Zhang, L., Chen, G., Xiong, X.F., Hua, J.F., Mu, L.J., and Wu, W.X.: Spatial distribution characteristics of mine water quality in coal mining areas of China and technological approaches for mine water

treatment. J. China Coal Soc., 50(1), 584-599 (in Chinese with English abstract), <https://doi.org/10.13225/j.cnki.jccs.YG24.1547>, 2025.

## Novelty and Original Contribution

**Strengths:** The study assembles a large national dataset and applies risk assessment models to evaluate health impacts, which is commendable. The spatial mapping of contamination hotspots and risk distribution provides valuable insights for policy-making.

**[Response]** No change needed. Thank you for your positive comments.

**Concerns:** One key issue is that the manuscript does not sufficiently highlight what is new compared to earlier studies. Although the scale of the data collection is impressive, the paper lacks a clear statement of its novel contributions relative to existing literature. The authors could enhance the manuscript by emphasizing unique aspects—such as new methodological approaches, previously unreported spatial trends, or innovative risk assessment strategies—that set this work apart.

**[Response]** The point is well taken. We have incorporated your concerns into the revision and a more explicit statement has been added to the revised **Conclusion**, highlighting the novelty and practical implications of our manuscript relative to the existing literature (**Lines 743-771**). See also the response to your general comment above.

## Methodological Rigor and Data Quality

**Strengths:** The methodology is generally robust, with clear criteria for data quality control and appropriate use of standard risk assessment models (e.g., those provided by the US EPA). The division of water samples (acidic vs. neutral/alkaline) and the differentiation between coal and metal mines are well executed.

**[Response]** No change needed. Thank you for your positive comments.

**Suggestions:** To further strengthen the paper, the authors should elaborate on how potential biases (e.g., variations in sample density among regions) were addressed. Additionally, more detailed statistical tests comparing water quality parameters between different mining types (such as using non-parametric tests) could provide further evidence for the observed differences.

**[Response]** Comment accepted. Indeed, there are potential biases caused by variations in sample density among regions. Therefore, our future in-depth research will attempt to address the biases by (i) combining the data mining and field sampling methods to investigate the potential contamination levels in more coal and metal mines across China; (ii) balancing the sampling

density within each zone using bias correction techniques (*e.g.*, kernel density estimation and stratified spatial resampling) to ensure the data representation; and (iii) incorporating spatial uncertainty into the criteria to improve the spatial robustness for the assessments of mining-affected water pollution (**Lines 710-716**). Furthermore, we have added the results of non-parametric tests (*i.e.*, Mann-Whitney U-test and Spearman's rank correlation) to further support the differences observed in our study based on your suggestions (**Lines 117-131** in the **Supplement**):

Non-parametric tests do not rely on assumptions about the distribution of the data and are suitable for non-normally distributed datasets or those containing outliers (Cardew, 2003). These methods statistically compare central tendencies, typically represented by medians, rather than means. The result of the Mann-Whitney U-test ( $p < 0.05$ ) shows a statistically significant difference in the critical parameters (except Fe) of mining-affected water based on the different mine types (coal mine vs. metal mine), indicating the differences caused by geological factors, mining practices, surrounding environment, etc. Besides, Fig. S7 shows the Spearman correlation coefficients between the hydrochemical compositions in the mining-affected water. It can be seen that strong negative correlations are observed between pH and  $\text{SO}_4^{2-}$ , Fe, Mn, Al, and heavy metals while positive correlations are observed between  $\text{SO}_4^{2-}$  and metal components, implying that the spatial consistency of acid water, high sulfate, high Fe and Mn, and high heavy metal mining-affected water.

Cardew, P.T.: A method for assessing the effect of water quality changes on plumbosolvency using random daytime sampling. *Water Res.*, 37(12), 2821-2832, [https://doi.org/10.1016/S0043-1354\(03\)00120-9](https://doi.org/10.1016/S0043-1354(03)00120-9), 2003.

## Presentation and Interpretation of Results

Strengths: The results are logically presented, starting from the basic water quality parameters, moving on to spatial distribution patterns, and culminating in detailed risk assessments for different populations. Figures (*e.g.*, maps and boxplots) support the textual description and help visualize the trends effectively.

**[Response]** No change needed. Thank you for your positive comments.

Suggestions: Although the numerical details are extensive, the manuscript may benefit from a more concise presentation. For example, summarizing key quantitative findings in a table could improve clarity. Additionally, while the spatial patterns are well described, a deeper discussion on the underlying geochemical or environmental processes that cause these trends would better contextualize the results.

**[Response]** Thank you for your insightful comments. To improve the clarity of the manuscript, key quantitative results (*e.g.*, statistics of critical parameters for acid and neutral/alkaline water

across different mines) have been summarized in [Table 1](#) in the revised manuscript and [Table S4](#) in the **Supplement**. Moreover, a further elaboration of the underlying mechanisms (*e.g.*, geochemical conditions and environmental processes) driving the spatial patterns of mining-affected water pollution in China, especially in the highly polluted southern regions, has been added in [Section 4.1](#) of the revised manuscript (**Lines 534-573**).

### Structure and Coherence of the Argument

**Strengths:** The manuscript follows a conventional structure (introduction, methodology, results, discussion, conclusion) that makes it easy to follow. The discussion ties the findings back to the broader context of water pollution management.

**[Response]** No change needed. Thank you for your positive comments.

**Suggestions:** The transition between sections—especially from the results to the discussion—could be smoother. Explicitly linking how each result addresses the stated objectives would reinforce the coherence of the argument. Also, highlighting the novelty and practical implications of the work in the conclusion would help reinforce the manuscript's contribution.

**[Response]** Comment accepted. We have rewritten the transition between sections to reinforce the coherence of the argument. Moreover, a detailed discussion of the novelty and practical implications of our manuscript has been supplemented in the **Conclusion** to highlight the unique contribution and valuable addition to the field of environmental hydrology (**Lines 743-771**).

### Figures, Tables, and Visual Aids

**Strengths:** Visual aids are generally clear and provide a good overview of the data distribution and risk maps. The integration of detailed figures (such as spatial distribution maps and risk assessment graphs) adds significant value to the manuscript.

**[Response]** No change needed. Thank you for your positive comments.

**Suggestions:** Ensure that all figures have clear legends and consistent formatting. It might be beneficial to include a summary table that aggregates the key findings (*e.g.*, median values of critical parameters across different mine types) to enhance readability.

**[Response]** Thank you for your constructive suggestions. We have reviewed/revised all figures to ensure that they have clear legends and consistent formatting. To improve overall readability, the

summary tables (*i.e.*, [Table 1](#) in the revised manuscript and [Table S4](#) in the **Supplement**) showing the statistics of critical parameters for different mine types have been added to the current revision.

## Language and Style

**Strengths:** The manuscript is written in clear, professional English with an appropriate academic tone. Technical terms are defined upon first use, and the text is generally free of major grammatical errors.

**[Response]** No change needed. Thank you for your positive comments.

**Suggestions:** A few sentences could be simplified to improve readability. In particular, some complex sentences in the introduction and discussion might be broken into shorter, more digestible statements. Maintaining consistency in terminology (for instance, ensuring that terms like “differentiated management” are clearly defined) will also help in reinforcing the manuscript’s clarity.

**[Response]** Comment accepted. We have simplified some complex sentences in the **Introduction** and **Discussion** to improve the readability of the manuscript. Moreover, a clear definition of terms like "differentiated management" has been added in the revised manuscript to reinforce the manuscript's clarity (**Lines 650-655**):

The differentiated management mentioned in the current study is an optimized regulatory paradigm that customizes strategies to mine types (coal vs. metal) and operational status (active vs. abandoned) based on hydrogeological conditions, pollution source characteristics, and multi-system sustainability requirements. The initiative aims to implement targeted intervention and precise prevention/control to mitigate pollution risks, restore and enhance ecological functions, while concurrently safeguarding human health.

## Conclusion

The manuscript presents an extensive dataset and a rigorous analysis of mining-affected water pollution in China, offering useful insights for environmental management and policy-making. However, the work would benefit from a more explicit discussion of its novelty compared to previous studies. Clarifying and emphasizing the unique contributions—whether in data scale, methodological advancements, or new insights into spatial and health risk patterns—would significantly strengthen the paper. With these revisions, the manuscript could represent a valuable addition to the field of environmental hydrology.

**[Response]** We sincerely appreciate your conscientious and constructive comments. A more explicit discussion of the novelty compared to previous studies has been added to the revised manuscript (**Lines 743-771**), to provide new insights into the spatial patterns and health risks of mining-affected water pollution at the national scale, and to clarify and emphasize the unique

contributions of our study. We believe that your insightful comments on 'Novelty and Original Contribution', 'Methodological Rigor and Data Quality', 'Presentation and Interpretation of Results', 'Structure and Coherence of the Argument', 'Figures, Tables, and Visual Aids', and 'Language and Style' have led to significant improvements of the revised manuscript.
